# Supplementary material for: Profiling the Genome-Wide Landscape of Short Tandem Repeats by Long-Read Sequencing
Source: Front Genet. 2022 May 5;13:810595. doi: 10.3389/fgene.2022.810595 (PMC9117641; doi:10.3389/fgene.2022.810595)
Supplement: Supplementary file 11 [file Table6.XLSX]

## Sheet: vhSTR list
#Chr	Start	End	Repeat_Unit	Gene_symble	Gene_Func	normalized RDI
8	140816257	140817022	CCA	TRAPPC9	intronic	0.9672131147540983
1	236656704	236656873	TATG	EDARADD	downstream	0.36585365853658536
1	12975368	12975488	TCCC	PRAMEF7;PRAMEF8	upstream	0.25
11	49663470	49663546	TAAAA	LOC440040	intronic	0.6
17	746179	746319	GAAA	NXN	intronic	0.17647058823529413
6	69034414	69034444	TAA	LOC101928280	intronic	0.625
21	35338138	35338310	TATG	LINC00649	intronic	0.5348837209302325
1	117669569	117669686	TTC	TRIM45	upstream	0.08695652173913043
6	143183677	143183853	TTATA	HIVEP2	intronic	0.4594594594594595
8	100372348	100372521	TTTC	VPS13B	intronic	0.17073170731707318
7	51170414	51170468	TTCA	COBL	intronic	0.8421052631578947
5	82820315	82820404	CCTA	VCAN	intronic	0.2
15	82659351	82659406	TATG	UBE2Q2P2	intronic	1.4375
20	55992420	55992711	TGGA	RBM38	downstream	0.20253164556962025
12	108972690	108972983	CCA	ISCU	downstream	0.1941747572815534
12	5671656	5671788	GGAGA	ANO2	downstream	0.12903225806451613
7	66193779	66193938	CACCAT	RABGEF1	intronic	0.5833333333333334
9	129086794	129086826	TAA	MVB12B	upstream	0.625
1	237719579	237719614	TTA	RYR2	intronic	0.3076923076923077
9	14123684	14123842	CCTG	NFIB	intronic	0.11428571428571428
3	71802798	71802844	CGG	EIF4E3	intronic	0.59375
8	61591319	61591371	CGG	CHD7	UTR	1.8181818181818181
14	36986814	36986930	CCG	NKX2-1	exonic	0.4642857142857143
8	142864106	142864643	TCCA	MIR1302-7	upstream	1.0
1	10360295	10360326	TAA	KIF1B	intronic	0.42857142857142855
1	7831228	7831364	CCCCG	VAMP3	UTR	0.25
7	107326822	107326946	TTTC	SLC26A4	intronic	0.17142857142857143
3	109196750	109196816	TCTA	LINC01205	intronic	0.26666666666666666
4	165179543	165179571	TAA	MARCH1	intronic	0.3333333333333333
2	3186817	3186986	TCCA	EIPR1	downstream	0.43902439024390244
7	156275206	156275387	GAAA	LINC01006	intronic	0.20512820512820512
1	49054470	49054545	GAGAA	AGBL4	intronic	0.25
5	61901540	61901573	TTA	IPO11-LRRC70	intronic	0.3333333333333333
9	9787772	9787798	TTA	PTPRD	intronic	0.4444444444444444
12	26770577	26770755	GGAA	ITPR2	intronic	0.2916666666666667
8	33319640	33319685	GGAAA	FUT10	intronic	0.2571428571428571
17	11991721	11991844	TATAA	MAP2K4	intronic	0.20689655172413793
10	5477437	5477535	TAGA	NET1	intronic	0.3684210526315789
7	72316685	72316726	TTG	SBDSP1	upstream	0.3076923076923077
16	31281452	31281512	TTTCC	ITGAM	intronic	0.5
17	65347508	65347547	TAA	PSMD12	intronic	0.3333333333333333
1	228256488	228256649	ATAGG	WNT3A	downstream	0.13793103448275862
1	15376514	15376706	AGTAG	KAZN	intronic	0.5333333333333333
22	45280350	45280533	CACCAT	PHF21B	intronic	0.24444444444444444
3	65936625	65936749	GGAA	MAGI1-IT1	intronic	0.25
4	1019795	1019897	CACG	FGFRL1	UTR	0.3333333333333333
8	106405523	106405620	TTTC	ZFPM2	intronic	0.1724137931034483
1	68348792	68348845	TCCA	GNG12-AS1	intronic	0.21428571428571427
15	59902650	59902829	TCCC	GCNT3	intronic	0.3283582089552239
3	36784788	36784827	TAAAA	DCLK3	upstream	0.4444444444444444
9	116638356	116638467	CGCGG	ZNF618	upstream	0.16666666666666666
X	44968383	44968417	TAAA	KDM6A	intronic	1.3846153846153846
6	160133410	160133595	CCA	SOD2	intronic	0.5538461538461539
2	207800454	207800545	TCCA	CPO	upstream	0.5483870967741935
2	8808059	8808724	TGGA	ID2-AS1	intronic	0.03680981595092025
10	52621014	52621197	TAG	A1CF	intronic	0.6341463414634146
2	12188192	12188338	TCTA	MIR3681HG	intronic	0.21052631578947367
10	98911040	98911179	TAGG	SLIT1	intronic	0.15151515151515152
11	69058897	69059076	CAT	MYEOV	upstream	0.9152542372881356
14	67307685	67307767	TAGA	GPHN	intronic	0.2727272727272727
2	242157443	242157622	CGGGG	ANO7	intronic	0.5416666666666666
2	1959823	1960005	TCTA	MYT1L	intronic	0.6382978723404256
12	109741993	109742133	GAAA	FOXN4	intronic	0.2222222222222222
2	38230689	38230778	TAGA	RMDN2-AS1	intronic	0.17391304347826086
7	55235147	55235217	TGG	EGFR	intronic	0.375
13	27171581	27171607	TTG	WASF3	intronic	1.6363636363636365
3	182924661	182924820	GGAA	MCF2L2	intronic	0.2857142857142857
10	28171098	28171165	GAAA	ARMC4	intronic	0.25
20	1170608	1170788	TTC	TMEM74B	upstream	0.19875776397515527
9	125839889	125839972	TATTG	RABGAP1	intronic	0.375
17	75176112	75176190	TTATG	SEC14L1	intronic	0.3125
8	48819939	48819971	CATA	PRKDC	intronic	0.625
12	119560048	119560165	GGAA	SRRM4	intronic	0.12903225806451613
13	40136659	40136843	CATATA	LHFP	intronic	0.37777777777777777
6	110587042	110587105	TCC	METTL24	intronic	0.3333333333333333
7	2554743	2554912	TCCA	LFNG	intronic	5.574468085106383
10	15271401	15271556	CAT	FAM171A1	intronic	0.31683168316831684
20	52253426	52253461	GGAAA	LOC105372672	downstream	1.9
X	49080542	49080714	TTGGGG	CACNA1F	intronic	0.2
6	143139803	143139955	GAAA	HIVEP2	intronic	0.13513513513513514
7	158234699	158234878	TGG	PTPRN2	intronic	0.3442622950819672
2	141221764	141221787	TAA	LRP1B	intronic	2.111111111111111
2	211354468	211354480	GGAA	CPS1	intronic	0.6666666666666666
7	158386829	158386983	TGG	PTPRN2;LINC01022;MIR5707	downstream	0.4318181818181818
8	143076130	143076159	TCCA	MIR4539	upstream	1.8888888888888888
X	86770031	86770217	TTATA	KLHL4	upstream	0.36363636363636365
1	241083554	241083722	TGG	RGS7	exonic	0.16216216216216217
7	28736475	28736546	CATA	CREB5	intronic	0.9
8	32619078	32619131	TTTTA	NRG1	intronic	0.4444444444444444
19	49660145	49660343	TCTCTG	HRC;TRPM4;PPFIA3	upstream	0.8620689655172413
13	72228521	72228652	TAAAA	DACH1	intronic	0.21428571428571427
1	78353597	78353698	TTC	NEXN-AS1	exonic	0.41509433962264153
X	16713125	16713149	CAA	CTPS2	intronic	1.1111111111111112
3	40503520	40503552	CTG	RPL14	exonic	0.38461538461538464
10	71561577	71561616	GGA	COL13A1	upstream	0.4166666666666667
17	15466916	15467032	CGGGG	TVP23C;TVP23C-CDRT4	upstream	0.47058823529411764
1	46664190	46664231	CGG	POMGNT1	intronic	0.2857142857142857
8	37784554	37784600	TCTCCC	GOT1L1	downstream	0.7272727272727273
11	64362686	64363122	TGGA	SLC22A12	intronic	0.24074074074074073
19	39634733	39634836	TAGA	PAK4	intronic	0.8333333333333334
10	116548082	116548126	TAAA	LOC101927692	downstream	0.36363636363636365
10	70384349	70384505	TTTC	TET1	intronic	0.1794871794871795
3	134705970	134706009	TAA	EPHB1	intronic	1.2857142857142858
X	19063409	19063441	TTA	ADGRG2	intronic	0.46153846153846156
17	72587401	72587431	TAA	C17orf77;CD300LD	intronic	0.3333333333333333
X	2762486	2762662	TATATG	GYG2	intronic	0.7666666666666667
9	94397282	94397375	GGA	MIR3910-1;MIR3910-2	intronic	0.265625
16	88898076	88898255	GGGTG	GALNS	intronic	0.23333333333333334
7	64499073	64499257	CGGGG	CCT6P3	intronic	0.16666666666666666
3	58269263	58269341	TGGA	ABHD6	intronic	0.9444444444444444
11	63777793	63778059	TTGG	MACROD1	intronic	0.12698412698412698
19	57990688	57990719	TTTA	ZNF419;ZNF772	intronic	0.4444444444444444
16	15858978	15859148	TGGA	MYH11	intronic	0.9230769230769231
1	49090762	49090818	TTCC	AGBL4	intronic	0.5714285714285714
3	189553704	189553758	TAA	TP63	intronic	0.35294117647058826
7	99729027	99729056	TTTC	CNPY4;MBLAC1	intronic	2.1
11	1148956	1149308	CTCA	MUC5AC	upstream	0.21714285714285714
6	49669555	49669725	TTATA	CRISP2	intronic	0.6764705882352942
2	36582746	36582771	AGGGGG	CRIM1;LOC100288911	upstream	0.8
8	6850872	6850903	TTTC	DEFT1P;DEFT1P2;DEFA1;DEFA1B	downstream	0.7692307692307693
4	15804110	15804198	TTTTA	CD38	intronic	0.21052631578947367
16	67063020	67063116	CGG	CBFB	UTR	0.25
14	103388365	103388477	TCCA	AMN	upstream	0.17857142857142858
2	160927324	160927346	CAAA	PLA2R1	upstream	1.0
12	13153169	13153361	CGGGG	HEBP1	exonic	0.42424242424242425
12	107856603	107856775	ATG	BTBD11	intronic	0.28
X	48814663	48814750	CCG	OTUD5	exonic	0.22727272727272727
1	36542943	36543011	TAA	TEKT2	downstream	0.2857142857142857
17	11601437	11601598	TATAA	DNAH9	intronic	0.29411764705882354
6	140097154	140097227	CAA	LOC100132735	upstream	0.25
1	240083784	240083839	TCCA	CHRM3	upstream	3.2142857142857144
20	4727159	4727217	TTTTA	PRNT	upstream	0.6
7	154760540	154760563	CTG	PAXIP1	exonic	0.6666666666666666
22	18054895	18054918	TTA	SLC25A18	intronic	1.0
6	148708647	148708828	TTTC	SASH1	intronic	0.40350877192982454
12	21661811	21661856	TAGA	GOLT1B	intronic	0.21428571428571427
10	1613832	1614006	TGAG	ADARB2	intronic	0.24324324324324326
14	72099827	72099891	TTATG	SIPA1L1	intronic	0.38461538461538464
8	98442929	98443101	TAGA	LOC101927066	upstream	0.16129032258064516
2	98559423	98559565	GAAA	TMEM131	intronic	0.2857142857142857
15	99191351	99191385	TCCCC	IRAIN	upstream	0.5555555555555556
6	160132091	160132271	CCA	SOD2	intronic	0.33962264150943394
10	1255489	1255635	CACCAT	ADARB2	intronic	0.16666666666666666
14	70381579	70381618	TTCA	SMOC1	intronic	0.3333333333333333
13	100944826	100944888	TTA	PCCA	intronic	0.2777777777777778
11	3053213	3053321	TCCC	CARS-AS1	intronic	0.5238095238095238
3	188242666	188242737	TTCC	LPP	intronic	0.4666666666666667
17	16030702	16030790	TATATG	NCOR1	intronic	0.8235294117647058
13	27677744	27677767	TAA	USP12	intronic	1.5
11	63539357	63539476	GGA	C11orf95	upstream	0.1794871794871795
11	88707542	88707591	TAGA	GRM5	intronic	0.35714285714285715
2	71880955	71881103	CATAA	DYSF	intronic	0.3157894736842105
6	167253168	167253206	GGAGA	RPS6KA2	intronic	0.3076923076923077
14	69140384	69140448	CATA	RAD51B	intronic	1.2
12	105594610	105594699	TCTA	APPL2	intronic	0.38095238095238093
10	128986043	128986065	CAAG	DOCK1;FAM196A	intronic	0.5714285714285714
17	45652946	45652985	TTA	NPEPPS	intronic	0.4166666666666667
7	3191771	3191821	TTA	LOC100129603	intronic	0.4375
9	124588643	124588722	TATATG	TTLL11	intronic	0.8571428571428571
17	79227346	79227703	CACCAT	SLC38A10	intronic	0.17857142857142858
6	138407431	138407451	TAA	PERP	downstream	0.8461538461538461
14	48009690	48009766	TATATG	MDGA2	intronic	0.3225806451612903
12	27647420	27647457	TTA	SMCO2	intronic	0.42857142857142855
18	10607530	10607673	CGGGG	LINC01887	downstream	0.8888888888888888
12	118374338	118374380	TAG	KSR2	intronic	0.5
2	85198391	85198426	CCG	KCMF1	UTR	1.1333333333333333
22	18878724	18878797	TATAA	LINC01663	upstream	0.4666666666666667
16	20991511	20991670	TTATA	DNAH3	intronic	0.22580645161290322
1	19521760	19521789	TAA	UBR4	intronic	0.625
6	43215380	43215426	CGTG	TTBK1	intronic	0.4
22	18719080	18719658	TTATA	LINC01662	upstream	0.15873015873015872
11	111783925	111783969	TCC	HSPB2-C11orf52	UTR	0.9
16	909761	909916	GTGTG	LMF1	intronic	0.5172413793103449
12	45573498	45573550	TAA	PLEKHA8P1	intronic	0.25
8	1439206	1439234	TAAAA	DLGAP2	upstream	0.5
16	79756553	79756620	TGG	MAFTRR	intronic	0.3181818181818182
4	54121364	54121400	TTTA	SCFD2	intronic	0.45454545454545453
7	1974423	1974713	CAGA	MAD1L1	intronic	0.06153846153846154
19	8171613	8171929	TGGA	FBN3	intronic	0.05714285714285714
22	28796510	28796550	TAG	TTC28	intronic	0.45454545454545453
5	171516879	171517054	TGGA	STK10	intronic	0.13953488372093023
7	157446486	157446625	CACCC	PTPRN2	intronic	0.782608695652174
9	97505449	97505555	GAA	C9orf3	intronic	0.36585365853658536
6	17706983	17707146	CCG	LOC105374952	exonic	0.32432432432432434
2	242911764	242911951	ATGGTG	LINC01237	intronic	0.17857142857142858
19	6954358	6954453	GGAA	ADGRE4P	intronic	0.28
4	185006947	185006983	TTCC	ENPP6	downstream	0.4
9	3661705	3661747	CTG	RFX3-AS1	intronic	0.2222222222222222
18	28894235	28894244	TATAA	DSG1	upstream	1.0
19	33913696	33913858	TCTA	PEPD	intronic	0.23076923076923078
2	182140518	182140585	CCCTAA	LINC01934	intronic	0.36363636363636365
22	31986937	31986975	TTTA	SFI1	intronic	0.45454545454545453
1	149643288	149643315	GAAA	LINC00869;LOC103091866	upstream	1.9166666666666667
X	54940359	54940551	CATATA	TRO	upstream	2.72
4	100427699	100427882	TTTC	C4orf17	upstream	0.7843137254901961
15	94494860	94495040	TCTA	LINC01580;LINC01581	intronic	0.30952380952380953
13	19642765	19642805	CAT	LOC107984132	upstream	0.5384615384615384
5	3446843	3447018	ATGGTG	LINC01019	intronic	0.5333333333333333
14	95786303	95786373	CGCGG	CLMN;LINC02292	upstream	1.3571428571428572
17	63769007	63769045	ATG	CEP112	intronic	0.5555555555555556
10	20333076	20333258	TTTC	PLXDC2	intronic	0.37209302325581395
8	113934305	113934401	TATG	CSMD3	intronic	0.6190476190476191
7	150895341	150895520	TGGA	IQCA1L	intronic	0.09523809523809523
16	4276465	4276874	TGGA	SRL	intronic	0.19801980198019803
13	30996429	30996506	CAGCC	LINC01058	upstream	0.2777777777777778
4	155508869	155508975	GAAA	FGA	intronic	0.17857142857142858
12	121657369	121657464	TGGA	P2RX4	intronic	0.2916666666666667
19	35149695	35149720	CAA	SCGB1B2P	intronic	1.75
22	17731365	17731530	TAAAA	CECR3	downstream	0.11764705882352941
14	60900149	60900479	TTATA	C14orf39	intronic	0.3013698630136986
1	236030197	236030223	CCG	LYST	UTR	0.5555555555555556
11	114019058	114019161	TTCC	ZBTB16	intronic	0.6
16	368650	368759	CGTG	AXIN1	intronic	0.5
3	35709335	35709545	GAA	ARPP21	intronic	0.16176470588235295
11	93789823	93789874	TCTA	HEPHL1	intronic	0.3076923076923077
7	99178749	99178800	TTTA	ZNF655	intronic	0.3333333333333333
8	27842215	27842316	TTCA	SCARA5	intronic	0.7083333333333334
20	61386932	61387101	TCCC	NTSR1	intronic	0.6666666666666666
2	166147946	166148120	TTTC	SCN2A	intronic	0.35714285714285715
10	195222	195266	TTA	ZMYND11	intronic	0.35714285714285715
11	122152819	122152996	GAAA	MIR100HG	intronic	0.21739130434782608
11	61471128	61471196	TGGA	DAGLA	intronic	0.21052631578947367
2	242765676	242766028	TCTCTG	NEU4	downstream	1.9692307692307693
15	44815586	44815644	CATA	CTDSPL2	intronic	0.3333333333333333
17	70432121	70432165	TTCC	LINC00673	intronic	0.5833333333333334
11	57390644	57390824	GGAA	SERPING1	downstream	0.17777777777777778
15	101995153	101995203	TGAA	PCSK6	intronic	0.5
19	39093909	39094086	CATATA	MAP4K1	intronic	0.46153846153846156
10	44883172	44883208	TAAA	CXCL12	upstream	0.5555555555555556
17	26248808	26248844	TTTA	LINC01992	downstream	0.25
4	25554997	25555181	TTTC	LOC101929161	downstream	0.19148936170212766
14	89827418	89828189	CCA	FOXN3	intronic	0.1048951048951049
2	12313598	12313784	TCTA	MIR3681HG	intronic	0.6095238095238096
20	36794613	36794714	TCCA	TGM2	intronic	0.23333333333333334
1	100460660	100460723	TTTC	SLC35A3	intronic	0.29411764705882354
1	230411626	230411737	CATATA	GALNT2	intronic	0.6666666666666666
22	49016733	49016793	TCCA	FAM19A5	intronic	0.5428571428571428
2	11032512	11032688	TCCA	LINC01954	downstream	0.5217391304347826
5	176338090	176338180	GAAAA	UIMC1	intronic	0.5294117647058824
9	135049336	135049428	CGGA	NTNG2	intronic	0.8888888888888888
12	113794223	113794350	TTCC	PLBD2	intronic	0.22580645161290322
1	61437138	61437243	TGGA	NFIA-AS2	intronic	0.17391304347826086
1	245565204	245565261	CAA	KIF26B	intronic	0.10810810810810811
6	124232911	124233006	CATA	NKAIN2	intronic	0.36666666666666664
18	44296049	44296101	TAGA	ST8SIA5	intronic	0.5714285714285714
2	3318800	3318995	CCA	EIPR1	intronic	1.3571428571428572
10	69933331	69933377	TTTA	MYPN	intronic	0.4444444444444444
22	37490423	37490609	TAGA	TMPRSS6	intronic	0.125
19	12084855	12085020	TTTC	ZNF763	intronic	0.1282051282051282
15	96732414	96732618	TATTG	NR2F2-AS1	intronic	0.125
11	3570501	3570565	TATG	LOC101927708	intronic	0.7647058823529411
8	86246806	86246890	TTCC	CA1	intronic	0.22727272727272727
22	47538049	47538381	CCCA	TBC1D22A	intronic	0.1038961038961039
9	132092011	132092033	TTA	LINC01503;C9orf106	downstream	0.7142857142857143
16	31345729	31345790	TTTC	ITGAM	downstream	1.0689655172413792
16	82851595	82851717	CATG	LOC101928446	intronic	0.1724137931034483
8	119123936	119123974	CGG	EXT1	UTR	0.38461538461538464
16	9495403	9495439	CAT	LINC02177	intronic	10.074074074074074
1	16469518	16469564	TGGG	EPHA2	intronic	0.6333333333333333
11	9989458	9989517	TCTG	SBF2	intronic	0.4
19	15311648	15311697	CGG	NOTCH3	exonic	0.3125
2	127962019	127962200	GAAA	CYP27C1	intronic	0.24615384615384617
10	22614554	22614592	CCCG	BMI1;COMMD3-BMI1	UTR	0.45454545454545453
17	63965489	63965708	CATA	CEP112	intronic	0.15217391304347827
2	25449576	25449596	TTTA	DNMT3A	downstream	1.0
4	4652067	4652114	TAA	STX18-AS1	intronic	0.4
5	141771548	141771736	TTCC	SPRY4-AS1	intronic	0.18604651162790697
22	32963306	32963356	TCCC	SYN3	intronic	0.2857142857142857
9	112750961	112751006	GGAA	PALM2-AKAP2	intronic	1.6451612903225807
16	86625217	86625250	TGG	FOXL1	downstream	0.6
14	102639770	102639823	TTA	WDR20	intronic	0.4375
20	25234259	25234300	TAAAA	PYGB	intronic	0.5
7	122117040	122117149	GGAGA	CADPS2	intronic	0.2631578947368421
12	124577031	124577373	ATG	RFLNA	intronic	0.9921875
1	3327638	3327818	CACG	PRDM16	intronic	0.2
5	35196137	35196214	TAAAA	PRLR	intronic	0.6153846153846154
8	143419829	143419992	GCTG	TSNARE1	intronic	0.19444444444444445
1	10776007	10776372	CACCC	CASZ1	intronic	0.109375
1	196380111	196380286	TTCC	KCNT2	intronic	0.48214285714285715
1	37505131	37505235	CTCA	GRIK3	upstream	0.5909090909090909
19	17687631	17687812	CTGGGG	COLGALT1	intronic	0.3225806451612903
22	47038858	47039267	TCCA	GRAMD4	intronic	0.1504424778761062
1	241140231	241140389	TCTA	RGS7	intronic	0.7413793103448276
15	23424504	23424524	TTA	GOLGA6L22	upstream	0.4444444444444444
10	135236929	135236990	CCG	SPRN	exonic	0.3125
6	161640904	161641009	CAGG	AGPAT4	intronic	0.21428571428571427
6	22293810	22293991	GGAA	PRL	intronic	1.3478260869565217
2	106685569	106685753	TTTC	C2orf40	intronic	0.9137931034482759
21	23123489	23123557	TAG	LINC01425	intronic	0.5384615384615384
X	155179466	155179578	TTAGGG	VAMP7	downstream	0.2857142857142857
9	113452246	113452310	TTATA	MUSK	intronic	1.3571428571428572
7	1928081	1928270	CGTG	MAD1L1	intronic	0.15384615384615385
3	165194038	165194207	GGAA	LINC01322	intronic	1.0602409638554218
1	13948546	13948569	TAA	PDPN	downstream	0.6666666666666666
9	129745047	129745230	TTC	RALGPS1	intronic	0.34375
12	86406533	86406556	CAA	MGAT4C	intronic	1.9
1	116600673	116600694	TAA	SLC22A15	intronic	0.7
1	175428049	175428212	CCA	TNR	intronic	0.37777777777777777
19	15474868	15474908	TAAA	AKAP8	intronic	0.46153846153846156
9	138470314	138470495	TCCA	LINC01502	intronic	1.0357142857142858
6	73833042	73833090	CAT	KCNQ5	intronic	0.3333333333333333
12	97220541	97220683	TTATA	CFAP54	intronic	0.5
20	20065045	20065084	CTG	CFAP61	intronic	0.4444444444444444
17	41174194	41174228	CGG	VAT1	exonic	0.5
8	74467777	74467803	CAA	STAU2	intronic	1.8
19	5673858	5674159	TCCA	HSD11B1L;C19orf70;SAFB	upstream	1.6266666666666667
19	14721775	14721799	TTTTTA	CLEC17A	UTR	0.5
2	230003696	230003865	GAAA	PID1	intronic	0.45652173913043476
4	1397395	1397554	CCG	NKX1-1	exonic	0.1111111111111111
X	53652753	53652878	CTGGGG	HUWE1	exonic	0.25
13	88195848	88195885	TAG	MIR4500HG	intronic	0.8571428571428571
8	98426208	98426416	GAAA	LOC101927066	upstream	0.12244897959183673
14	91431290	91431314	CAAA	RPS6KA5	intronic	2.3333333333333335
12	65929275	65929314	TTCA	LOC100507065	intronic	0.3
6	139492946	139492972	TTG	HECA	intronic	1.5
2	171984378	171984431	CATA	TLK1	intronic	0.3333333333333333
3	72114019	72114142	TCTA	LINC00877	intronic	0.19444444444444445
19	50699624	50699918	TCCA	MYH14	intronic	0.11764705882352941
7	71579228	71579298	GGGAA	CALN1	intronic	2.141263940520446
11	90564471	90564515	TTA	DISC1FP1	intronic	0.42857142857142855
12	8381339	8381435	TTA	FAM90A1;LINC02449;FAM86FP	intronic	0.13333333333333333
1	120290312	120290354	TCC	HMGCS2;PHGDH	downstream	0.4
10	72299694	72299873	TATG	PALD1	intronic	0.24691358024691357
16	88489110	88489720	TGGA	ZNF469	upstream	1.2167832167832169
12	91314571	91314601	TAAA	LINC00615	intronic	0.5
4	7457272	7457427	TTGGGG	SORCS2	intronic	0.35294117647058826
1	11047414	11047590	GAAA	C1orf127	downstream	0.29508196721311475
20	44059766	44059807	TTTA	MIR6812;PIGT	downstream	0.25
20	21491887	21491915	CAAAAA	NKX2-2	UTR	0.375
12	39845254	39845275	CCA	KIF21A	upstream	0.72
12	48568041	48568073	TAA	CCDC184	intronic	0.4166666666666667
18	44096689	44096937	CAT	LOXHD1	intronic	0.06944444444444445
6	105175433	105175527	CATA	HACE1	downstream	1.3
9	140288615	140289033	CCCCAG	EXD3	intronic	0.12280701754385964
2	110552161	110552206	CGG	RGPD5;RGPD6	intronic	0.48464163822525597
7	74855690	74855809	AGGGGG	GTF2IP1;PMS2P5	intronic	0.3125
6	76683962	76684141	TTTC	IMPG1	intronic	0.6446280991735537
19	1138022	1138149	GGGTG	SBNO2	intronic	0.2857142857142857
13	101732924	101732998	TTAA	NALCN	intronic	0.4857142857142857
12	128365133	128365310	TCCA	LINC02393;LINC00508	upstream	0.9761904761904762
2	44900594	44900675	GGAA	CAMKMT	intronic	0.2857142857142857
X	3774799	3774967	TAGA	LOC101930105;LOC729162	intronic	0.45
6	170209010	170209187	CCA	LINC00574	downstream	0.16326530612244897
14	94363038	94363192	GAAA	FAM181A-AS1	downstream	0.2631578947368421
4	128844697	128844751	TTA	MFSD8	intronic	0.2222222222222222
16	28082583	28082622	TTG	GSG1L	upstream	0.3076923076923077
15	37201145	37201182	CAA	MEIS2	intronic	0.4444444444444444
5	43285514	43285544	TTA	HMGCS1;NIM1K	upstream	0.5555555555555556
10	13909661	13909954	TATAA	FRMD4A	intronic	0.38095238095238093
2	228927859	228927965	TCTA	SPHKAP	intronic	0.14285714285714285
1	90187814	90187847	TAA	LRRC8C	intronic	0.36363636363636365
3	123167011	123167076	CCG	ADCY5	exonic	0.8636363636363636
1	1138107	1138207	CCCCAG	TNFRSF18;TNFRSF4;TTLL10	downstream	11.705882352941176
6	36249797	36249980	GAAA	PNPLA1	intronic	1.09375
18	24173224	24173404	GGA	KCTD1	intronic	1.2
2	75425140	75425166	CAA	TACR1	intronic	0.6785714285714286
17	78093819	78094023	CACCT	GAA	downstream	0.4186046511627907
1	1541939	1542005	GGCTG	FNDC10;MIB2	upstream	6.176470588235294
15	49229780	49229835	TAGA	SHC4	intronic	0.3076923076923077
12	18456216	18456270	TTTC	PIK3C2G	intronic	3.533333333333333
9	10230391	10230519	TCTA	PTPRD	intronic	0.11428571428571428
19	43897226	43897280	GGAA	TEX101	upstream	0.4
7	87638206	87638228	TAA	ADAM22	intronic	1.6470588235294117
17	78244896	78244938	TGGG	RNF213	intronic	0.4
X	2954704	2954872	TATAA	ARSF;ARSH	downstream	0.8717948717948718
16	3104136	3104305	TGGA	MMP25-AS1	exonic	0.2
12	22189640	22189709	CATA	CMAS	upstream	0.6153846153846154
11	65718984	65719024	TTA	TSGA10IP	intronic	0.25
12	133116056	133116384	CAGCC	FBRSL1	intronic	0.140625
2	88124233	88124407	CCG	RGPD1;RGPD2	intronic	0.42424242424242425
5	176585238	176585357	TTTC	NSD1	intronic	0.16129032258064516
11	63867339	63867397	TGGA	MACROD1	intronic	7.733333333333333
13	36441985	36442115	GAAA	DCLK1	intronic	0.3611111111111111
14	60901057	60901458	TTATA	C14orf39	intronic	0.2375
10	91515120	91515180	TTCC	KIF20B	intronic	0.6451612903225806
4	151480762	151480940	TTATA	LRBA	intronic	0.42424242424242425
10	35310717	35310853	AGGTG	CUL2	intronic	0.17857142857142858
6	142960010	142960064	GGAA	LOC153910	upstream	2.2857142857142856
1	145263724	145263744	TTG	NBPF19;NBPF20;NBPF9;NOTCH2NL	intronic	1.0769230769230769
9	72273132	72273316	TTTC	APBA1	intronic	0.3469387755102041
18	13106563	13106690	CCA	CEP192	intronic	0.375
X	1578835	1579003	TCTA	ASMTL;P2RY8	intronic	0.1951219512195122
16	67596511	67596622	CGG	CTCF	intronic	0.21875
18	6920290	6920478	TGG	ARHGAP28;LINC00668	exonic	0.3181818181818182
X	41366475	41366528	TATG	CASK	downstream	0.5882352941176471
10	98121666	98121792	CAATA	OPALIN;TLL2	downstream	0.13793103448275862
1	9836822	9836956	TCTA	CLSTN1	intronic	0.11428571428571428
1	161025572	161025747	TAAAA	ARHGAP30	intronic	0.5
17	79048168	79048339	CATG	BAIAP2	intronic	0.15625
3	149838169	149838310	TTCC	LOC105374313	intronic	0.21212121212121213
1	12671939	12671966	TAAA	DHRS3	intronic	0.5833333333333334
10	81884357	81884397	TTA	PLAC9	upstream	0.35714285714285715
16	8626706	8626771	GGAA	TMEM114	upstream	0.26666666666666666
9	96339170	96339198	CCCGG	PHF2	intronic	0.6666666666666666
12	45279867	45279938	GGAA	NELL2	intronic	0.2777777777777778
8	24406742	24406922	TCTA	LOC101929294	intronic	0.15625
12	131788083	131788403	CAT	LINC02415	upstream	0.0660377358490566
11	66090964	66091147	TGGA	CD248;RIN1	downstream	0.1
21	47511181	47511228	ATGGTG	COL6A2	downstream	1.0
14	77323047	77323278	TGGA	LRRC74A	intronic	0.2777777777777778
6	108279361	108279398	CCG	SEC63	exonic	0.46153846153846156
1	42756696	42756778	TAGA	FOXJ3	intronic	0.2608695652173913
5	140462231	140462266	TTTTC	LOC101926905	upstream	2.0
10	68864993	68865019	TAGA	CTNNA3	intronic	0.5882352941176471
10	78937004	78937189	TTCC	KCNMA1	intronic	0.40425531914893614
20	58213431	58213587	TGGA	PHACTR3	intronic	0.7435897435897436
X	152871118	152871160	GAAAA	FAM58A;LOC105373383	upstream	2.1818181818181817
19	53434632	53434655	GAAAA	ZNF321P	intronic	0.8571428571428571
12	24989727	24989908	GAAA	BCAT1	intronic	0.6904761904761905
6	16622576	16622626	TGG	ATXN1	intronic	0.6
11	16371198	16371315	GGAA	SOX6	intronic	0.34285714285714286
6	170485384	170485720	TTCTG	LOC102724511	downstream	0.24193548387096775
6	169433496	169433522	TAAAA	LOC101929460	downstream	0.5714285714285714
7	88521021	88521044	TTTTG	ZNF804B	intronic	0.6
4	172863376	172863419	TAAA	GALNTL6	intronic	0.4
7	104711987	104712056	TATG	KMT2E	intronic	0.2777777777777778
4	187548163	187548189	TGAA	FAT1	intronic	1.0
22	37075175	37075298	TTCC	CACNG2	intronic	0.17857142857142858
19	1407618	1407661	CCG	DAZAP1	UTR	0.35294117647058826
22	45279828	45279981	CCA	PHF21B	intronic	0.5522388059701493
17	75339067	75339125	TCTA	SEPT9	intronic	0.2222222222222222
6	55062078	55062213	CCCTAA	HCRTR2	intronic	0.29411764705882354
20	62728034	62728315	CACCAT	OPRL1	intronic	0.9135135135135135
9	137175950	137175995	TGGA	LINC02247	downstream	0.4
3	7141407	7141580	TATATG	GRM7	intronic	0.5185185185185185
6	36664529	36664607	TTCC	RAB44;CDKN1A	downstream	0.4444444444444444
1	184924426	184924497	TTTCC	FAM129A	intronic	0.35294117647058826
17	1372548	1372709	AGTAG	MYO1C	intronic	0.25925925925925924
11	126501019	126501059	TTCA	KIRREL3	intronic	0.36363636363636365
11	40373633	40373747	TTCC	LRRC4C	intronic	0.2692307692307692
3	197804653	197804824	TTATA	ANKRD18DP	intronic	0.43333333333333335
4	73266161	73266510	TATATG	ADAMTS3	intronic	0.4032258064516129
19	37206380	37206411	TAA	ZNF567	intronic	1.5333333333333334
4	162486376	162486399	CAT	FSTL5	intronic	0.36363636363636365
10	115447078	115447196	TATATG	CASP7	intronic	0.5454545454545454
16	870183	870210	TTCC	PRR25	downstream	0.7272727272727273
22	25001050	25001283	TTATA	GGT1	intronic	0.5172413793103449
7	35354707	35354865	TGG	LOC401324	upstream	0.08333333333333333
18	61630461	61630518	TTCC	SERPINB8;HMSD	intronic	1.0
3	129612469	129612518	CCG	TMCC1;TMCC1-AS1	upstream	0.4117647058823529
16	81702994	81703162	CACCT	CMIP	intronic	0.36666666666666664
6	40314628	40314660	CAT	LINC00951	intronic	0.5555555555555556
7	19020277	19020462	TTC	HDAC9	intronic	0.18032786885245902
12	107713599	107713706	CGG	BTBD11	exonic	0.2916666666666667
10	7764909	7765219	GAGTG	ITIH2	intronic	0.1206896551724138
10	25568071	25568130	CTG	GPR158	intronic	0.3076923076923077
19	31667713	31667733	CAA	LINC01791	intronic	0.6792452830188679
1	32937285	32937515	CAT	ZBTB8B	intronic	0.10144927536231885
1	13168846	13169010	GAAA	PRAMEF34P;PRAMEF36P	downstream	0.0975609756097561
1	82340276	82340370	TCTTG	ADGRL2	intronic	0.3
21	45073062	45073160	GGGAA	HSF2BP	intronic	0.25
9	102119680	102119769	TATAA	NAMA	intronic	0.5789473684210527
2	143923495	143923637	GAAA	ARHGAP15	intronic	0.13157894736842105
4	26852926	26852998	TCTA	STIM2;LOC105374546	upstream	0.45
4	7664900	7665077	TGAG	SORCS2	intronic	1.3707865168539326
7	158574989	158575161	TGAG	ESYT2	intronic	0.4375
6	17812029	17812061	TTCC	KIF13A	intronic	0.47058823529411764
5	83417352	83417397	TCTA	EDIL3	intronic	0.36363636363636365
7	104613625	104613744	GGGGA	LINC01004	intronic	0.18181818181818182
X	119047118	119047139	TAAAA	AKAP14	intronic	0.625
9	91181786	91181940	TCTA	NXNL2	intronic	0.11904761904761904
8	52345769	52345809	TAA	PXDNL	intronic	0.42857142857142855
3	186711344	186711393	TTTA	ST6GAL1	intronic	0.45454545454545453
16	33576709	33577572	AAATG	ENPP7P13	downstream	0.19270833333333334
5	37863123	37863284	TCTA	GDNF-AS1	intronic	0.5365853658536586
1	15364080	15364107	TTA	KAZN	intronic	0.4444444444444444
12	109747719	109747799	CGG	FOXN4	upstream	0.14285714285714285
8	12501756	12501916	TGGA	LOC729732	downstream	1.4210526315789473
10	702064	702232	CTATA	PRR26	intronic	1.935483870967742
19	38978774	38978999	TCCA	RYR1	intronic	0.10869565217391304
9	140033594	140033668	CCG	GRIN1	UTR	0.25
3	173471718	173471766	TATAA	NLGN1	intronic	0.34782608695652173
1	92199591	92199634	GGGA	TGFBR3	intronic	0.26666666666666666
X	85922286	85922318	GGAA	DACH2	intronic	0.8
2	2008994	2009175	CCTG	MYT1L	intronic	0.14634146341463414
1	2052917	2053071	TTAGGG	PRKCZ	intronic	0.875
17	43526993	43527170	CCTA	PLEKHM1	intronic	0.29310344827586204
14	92202847	92202885	GGAA	CATSPERB	intronic	0.5714285714285714
7	24612895	24612915	CGG	MPP6	UTR	0.7
1	87338727	87338791	TAAA	SELENOF	intronic	0.3125
19	51447124	51447233	CAGAGA	KLK5	intronic	0.5
2	214698127	214698165	TATG	SPAG16	intronic	1.3548387096774193
1	68598727	68598767	CAG	GNG12-AS1	intronic	0.4666666666666667
17	17054323	17054364	TTA	MPRIP	intronic	0.42857142857142855
4	5884949	5885008	TTCC	CRMP1	intronic	0.3333333333333333
12	8511162	8511246	TATG	LINC00937	intronic	0.45
18	76752802	76752979	CCG	SALL3	exonic	0.25
5	94438802	94438849	TTA	MCTP1	intronic	0.4
5	73840358	73840386	TAA	LINC01331	upstream	0.5
14	90352048	90352184	GAAA	EFCAB11	intronic	0.12
13	114562185	114562366	TATG	GAS6	intronic	0.4186046511627907
10	78112452	78112509	TTG	LRMDA	intronic	0.8
12	132310189	132310220	TTCC	MMP17	upstream	0.75
10	12843222	12843230	TCCA	CAMK1D	intronic	1.6363636363636365
12	113876771	113876811	TCTA	SDSL	downstream	1.9
1	234204700	234204860	TTATA	SLC35F3	intronic	0.4358974358974359
12	29944320	29944487	CATG	TMTC1	upstream	0.13513513513513514
10	69644840	69644897	CGA	SIRT1	exonic	0.7333333333333333
8	6336909	6336972	TTTA	MCPH1	intronic	0.3076923076923077
X	24589590	24589645	CAT	PCYT1B	intronic	0.19047619047619047
12	129160189	129160447	TAGA	TMEM132C	intronic	0.06666666666666667
16	80267922	80267953	ATG	LOC102724084	intronic	0.5
21	46345325	46345397	GGAA	ITGB2-AS1	intronic	0.2777777777777778
10	50008715	50008794	TTTC	WDFY4	intronic	0.25
X	51812509	51812529	TCC	MAGED4;MAGED4B;SNORA11D;SNORA11E	upstream	0.875
7	92211563	92211650	CATAA	FAM133DP	intronic	0.23809523809523808
12	18854540	18854587	TCC	PLCZ1	exonic	0.46153846153846156
11	2835230	2835663	TGGA	KCNQ1	intronic	0.13725490196078433
10	5690026	5690205	CACG	ASB13	intronic	1.9230769230769231
2	47280670	47280724	TTGG	TTC7A	intronic	0.25
11	1467258	1467680	GGCTG	BRSK2	intronic	0.175
10	87579724	87579897	GGAA	GRID1	intronic	0.35714285714285715
13	108519649	108519710	CCG	FAM155A	upstream	0.3684210526315789
8	1780480	1781046	CAGAGA	ARHGEF10	intronic	0.6568627450980392
3	38125761	38126110	TAG	DLEC1	intronic	1.3439878234398783
14	73776426	73776471	TAA	NUMB	intronic	0.25
19	47841913	47841946	TAA	C5AR2	intronic	0.4
7	104811273	104811455	GAAA	SRPK2	intronic	0.375
9	123463199	123463220	TAA	MEGF9	intronic	0.625
5	39333656	39333710	TCTCCC	C9	intronic	0.6428571428571429
1	228507193	228507903	TCCA	OBSCN	intronic	0.3372093023255814
2	225753509	225753602	TATG	DOCK10	intronic	0.64
8	100652204	100652255	TAA	VPS13B	intronic	0.6428571428571429
7	83789528	83789593	TCTA	SEMA3A	intronic	0.3333333333333333
20	2823407	2823550	TAGA	VPS16	intronic	1.4553990610328638
20	34301566	34301586	CCAA	RBM39	intronic	1.0
2	231563878	231563998	GGAA	LINC01907	intronic	0.1935483870967742
5	166825335	166825435	TTTC	TENM2	intronic	0.2916666666666667
17	78289779	78289856	TGG	RNF213	exonic	0.6923076923076923
20	43741566	43741742	CATA	WFDC5	intronic	0.13157894736842105
16	12676251	12676292	TTGGGG	SNX29	intronic	0.5
4	1387345	1387424	TAGA	CRIPAK	UTR	0.2
16	71576819	71576874	TTA	CHST4	intronic	0.2777777777777778
2	79390032	79390197	TAA	REG3A	intronic	0.13636363636363635
8	52656571	52656740	GGAA	PXDNL	intronic	0.40425531914893614
10	134087174	134087348	TGAA	STK32C	intronic	0.15384615384615385
21	45801262	45801432	TGGA	TRPM2	intronic	0.975609756097561
7	146922834	146923013	GGAA	CNTNAP2	intronic	1.05
2	192218982	192219024	TAA	MYO1B	intronic	0.2857142857142857
7	71436915	71437022	GAAA	CALN1	intronic	0.4
12	40047294	40047413	TTC	C12orf40	intronic	0.36363636363636365
8	142448933	142449113	TGGA	MROH5	intronic	1.2280701754385965
6	146872034	146872076	TATG	RAB32	intronic	0.8571428571428571
3	122498339	122498376	TTTA	HSPBAP1	intronic	0.4166666666666667
8	145911137	145911310	CCG	ARHGAP39	UTR	0.12
17	31519402	31519493	CAAAA	ASIC2	intronic	0.25
7	136591083	136591185	TATATG	LOC349160	intronic	0.2222222222222222
1	246419229	246419338	TAGA	SMYD3	intronic	0.16666666666666666
4	125636820	125636932	TATATG	ANKRD50	upstream	0.21052631578947367
17	63966750	63966903	CATA	CEP112	intronic	0.6133333333333333
14	101382995	101383130	TCTA	MEG8	intronic	0.12903225806451613
X	155181021	155181179	CTGGGG	VAMP7	downstream	0.6666666666666666
12	53763982	53764027	TTA	SP1	upstream	0.4
10	107034763	107034829	TTTTC	SORCS3	downstream	0.29411764705882354
2	236528015	236528198	CTGGGG	AGAP1	intronic	0.39473684210526316
X	68040112	68040184	TAA	EFNB1	upstream	0.2
2	78515586	78515618	TTTA	LOC101927967	downstream	2.3333333333333335
2	20867122	20867148	CGG	GDF7	exonic	0.46153846153846156
22	47774954	47775129	CGG	LOC339685	downstream	1.8197879858657244
7	71266361	71266456	TATG	CALN1	intronic	0.2
17	31719181	31719259	TTCC	ASIC2	intronic	0.3888888888888889
5	171556547	171556588	TTCA	STK10	intronic	0.42857142857142855
20	10130757	10131017	TATATG	SNAP25-AS1	intronic	0.3
20	51239494	51239538	CATG	LINC01524	intronic	0.6666666666666666
20	51791635	51791668	TTC	TSHZ2	intronic	0.6666666666666666
3	181084090	181084722	TTATA	SOX2-OT	intronic	0.5727272727272728
12	132640661	132640688	CACTA	NOC4L	downstream	0.5
2	142089044	142089123	TTTC	LRP1B	intronic	0.2857142857142857
3	29310516	29310561	CAAA	RBMS3-AS3	intronic	0.4444444444444444
12	104415647	104415827	GAA	GLT8D2	intronic	0.13333333333333333
22	39979039	39979663	TCCA	CACNA1I	intronic	0.33766233766233766
17	18846654	18846683	TTG	SLC5A10	upstream	0.36363636363636365
10	26941604	26941651	TAA	FAM238B	intronic	0.25
12	111343690	111343868	TATAA	CCDC63	intronic	0.25773195876288657
12	87108541	87108630	GGAA	MGAT4C	intronic	0.16
7	70640250	70640428	TCTA	GALNT17	intronic	0.4090909090909091
17	9950087	9950168	GGAA	GAS7	intronic	0.696969696969697
1	32060813	32061058	GAAA	TINAGL1	downstream	0.24074074074074073
1	61571772	61571806	TCTA	NFIA	intronic	0.4166666666666667
1	3025647	3025680	TAA	PRDM16	intronic	0.4166666666666667
8	22586007	22586125	TTCC	PEBP4	intronic	0.3448275862068966
6	153392012	153392189	TATATG	RGS17	intronic	0.5483870967741935
X	3557146	3557324	TGGA	PRKX	intronic	0.723404255319149
18	3536160	3536211	TTTC	DLGAP1	intronic	0.6428571428571429
17	54870093	54870273	TGG	C17orf67	intronic	0.21112372304199772
19	7042021	7042099	TTCC	MBD3L2;MBD3L4;MBD3L5	upstream	0.2857142857142857
1	198914788	198914817	TAA	MIR181A1HG	upstream	0.23529411764705882
8	143337200	143337748	CACCAT	TSNARE1	intronic	0.6220472440944882
17	78288008	78288242	TGG	RNF213	intronic	0.34196891191709844
19	37206411	37206447	TTA	ZNF567	intronic	0.875
X	2232216	2232399	GGGA	DHRSX	intronic	1.0778443113772456
15	29592297	29592658	TGGA	FAM189A1	intronic	0.8045977011494253
2	239027140	239027286	TGGA	ESPNL	intronic	0.3157894736842105
2	125464366	125464543	GGA	CNTNAP5	intronic	0.37349397590361444
17	7079395	7079528	CTCA	ASGR1	intronic	0.5294117647058824
17	20510994	20511100	TTCC	LINC02088	downstream	0.3225806451612903
9	42850855	42850878	TATG	LOC101928195;LOC101929583;LOC286297	intronic	1.0
16	27429325	27429408	TTTTA	IL21R	intronic	0.2857142857142857
10	99010982	99011177	GGGAA	ARHGAP19-SLIT1	intronic	1.8771929824561404
10	128954762	128954819	TTTTC	DOCK1;FAM196A	intronic	1.8
3	127420078	127420120	CAA	MGLL	intronic	0.4666666666666667
16	997930	998093	CAGAGA	LMF1	intronic	0.2962962962962963
19	6780123	6780170	TAA	VAV1	intronic	0.23529411764705882
17	75480698	75480728	ATGGTG	SEPT9	intronic	0.625
7	706666	706889	ATG	PRKAR1B	intronic	0.43902439024390244
17	74645574	74645677	TTCC	ST6GALNAC1	upstream	1.4411764705882353
9	71877216	71877270	TCC	TJP2	downstream	0.4482758620689655
6	166033102	166033282	TAGTG	PDE10A	intronic	5.590909090909091
3	196819921	196820012	CATATA	DLG1	intronic	0.45454545454545453
13	114579172	114579368	GTGTG	GAS6-AS2;LINC00454	upstream	0.7422680412371134
17	53885319	53885384	ATG	PCTP	intronic	1.6
22	45965519	45965562	GAA	FBLN1	intronic	0.46153846153846156
19	58935635	58935655	CAA	ZNF132;ZNF584	downstream	0.7083333333333334
16	8612774	8613315	TGAG	TMEM114	downstream	0.09219858156028368
14	75942259	75942401	CATA	JDP2	downstream	0.11764705882352941
2	111853786	111853831	TTA	ACOXL	intronic	0.21428571428571427
20	39688049	39688099	TAAA	TOP1	intronic	0.3076923076923077
1	224622226	224622261	GGA	CNIH3;WDR26	intronic	0.6666666666666666
X	2893567	2893628	CATA	ARSE	upstream	0.75
X	9870046	9870226	TGGA	SHROOM2	intronic	0.6588235294117647
12	70285341	70285496	TTTC	MYRFL	intronic	0.2391304347826087
Y	6740001	6740036	CAA	AMELY	intronic	0.6206896551724138
4	7849723	7849824	TGGA	AFAP1	intronic	0.20833333333333334
1	154844160	154844285	CATG	KCNN3	upstream	0.35294117647058826
3	160672674	160672789	TTCC	PPM1L	intronic	0.25
10	106851197	106851341	TTCC	SORCS3	intronic	1.5636363636363637
20	60147880	60147963	TGGA	CDH4	intronic	0.631578947368421
19	55646059	55646227	GGGGA	TNNT1	intronic	0.21333333333333335
9	91674528	91674703	TGG	SHC3	intronic	0.25120772946859904
6	165873027	165873057	CAGA	PDE10A	intronic	0.75
6	114545834	114545882	CATATA	HDAC2-AS2	intronic	0.8
19	56670356	56670785	TCCA	ZNF444	intronic	0.3559322033898305
12	93585024	93585053	GAAA	LOC643339	intronic	1.375
15	52664067	52664120	TAA	MYO5A	intronic	0.46153846153846156
20	21579272	21579447	TTTC	LINC01727	downstream	0.13636363636363635
2	155081614	155081709	TAGA	GALNT13	intronic	0.2857142857142857
14	29218157	29218202	TTG	FOXG1-AS1	intronic	0.29411764705882354
6	160131908	160132063	CCA	SOD2	intronic	0.5714285714285714
12	124823672	124823855	CCCA	NCOR2	intronic	0.37209302325581395
13	35173700	35173748	TTA	LINC00457;LINC02343	intronic	2.0
2	233030782	233030828	TAAA	DIS3L2	intronic	0.35714285714285715
20	24510354	24510479	TGG	SYNDIG1	intronic	6.444444444444445
10	24388074	24388101	TTTTTA	KIAA1217	intronic	0.5
1	49116116	49116205	TTCC	AGBL4	intronic	0.22727272727272727
5	175717091	175717125	CAG	SIMC1	exonic	0.5714285714285714
5	24632995	24633044	ATG	CDH10	intronic	0.3076923076923077
10	67875264	67875387	TAGA	CTNNA3	intronic	0.2
7	130842347	130842402	TTA	MKLN1	intronic	0.5333333333333333
1	36851461	36851485	CCG	STK40	UTR	0.875
X	28823734	28823787	CATA	IL1RAPL1	intronic	0.5
13	40116233	40116279	TAA	LHFP	intronic	0.29411764705882354
2	3061609	3061794	ATGGTG	LINC01250	intronic	0.7195121951219512
6	24927359	24927389	CCA	RIPOR2	intronic	0.7058823529411765
17	63966137	63966286	CATG	CEP112	intronic	0.21212121212121213
16	21691505	21691536	TCCA	OTOA	intronic	0.5
8	2923006	2923165	TAGA	CSMD1	intronic	1.9036144578313252
4	7616513	7616689	TCCA	SORCS2	intronic	3.6333333333333333
17	77169289	77169329	CATA	RBFOX3	intronic	0.6
16	87558028	87558205	TTAGGG	LOC101928737	downstream	0.14285714285714285
X	6079167	6079339	TATAA	NLGN4X	intronic	0.6774193548387096
17	63922831	63922857	TAA	CEP112	intronic	0.5555555555555556
12	127768350	127768451	GGAA	LINC02376	intronic	0.30303030303030304
1	248288834	248288917	TTCC	OR2M1P	downstream	0.23809523809523808
10	123891562	123891598	GAAA	TACC2	intronic	1.5
X	623931	624006	TATG	SHOX	downstream	0.16901408450704225
5	92826104	92826331	TGG	NR2F1-AS1	intronic	0.2159090909090909
5	420903	421040	CACG	AHRR	UTR	0.676056338028169
19	3140042	3140084	TCTA	GNA15	intronic	0.6153846153846154
X	77904417	77904492	TCTA	RTL3	downstream	0.2
7	43386849	43386869	TTTAA	HECW1	intronic	1.6666666666666667
5	163955174	163955214	TAA	LOC102546299	intronic	0.46153846153846156
19	54383798	54383983	CAGAGA	PRKCG;MYADM	intronic	0.1935483870967742
2	79341439	79341475	TTTA	REG1A	upstream	0.36363636363636365
3	46546090	46546124	CAA	RTP3	downstream	0.16129032258064516
7	102639251	102639280	TAA	FBXL13	intronic	1.8
13	34090191	34090238	CATATA	STARD13	intronic	0.5
6	144477077	144477187	TTTC	STX11	intronic	0.25
17	47443452	47443484	TTG	LOC102724596	exonic	0.5384615384615384
2	131683581	131683650	TTTC	ARHGEF4	intronic	0.2608695652173913
6	132922122	132922302	GGAA	TAAR3P	upstream	3.411764705882353
3	132505660	132505741	GAAA	NPHP3-AS1	intronic	0.2692307692307692
16	692265	692286	CCCGG	MCRIP2	intronic	1.0
8	118821405	118821470	TATG	EXT1	intronic	0.3157894736842105
10	104423474	104423618	TAAAA	ARL3;TRIM8	downstream	0.13793103448275862
12	18249403	18249586	TATG	RERGL	intronic	0.40425531914893614
X	3442645	3442825	CCA	SNORA48B	downstream	0.22727272727272727
1	110267685	110267755	GGGAA	GSTM3;GSTM5	upstream	0.25806451612903225
10	15736178	15736336	CATAT	ITGA8	intronic	0.30434782608695654
16	74780257	74780278	TTA	FA2H	intronic	0.5714285714285714
11	94748901	94749058	TATATG	KDM4E	downstream	0.52
19	11535936	11536117	TATATG	CCDC151	intronic	0.5
4	5672078	5672168	CAT	EVC2	intronic	0.38461538461538464
10	49995852	49996035	TTC	WDFY4	intronic	1.0649350649350648
10	717264	717441	CGGA	DIP2C	intronic	0.15
14	89977468	89977654	TTTC	FOXN3	intronic	0.2558139534883721
4	14618481	14618555	GGAAA	LINC00504	intronic	0.2222222222222222
13	94686442	94686517	GGAA	GPC6	intronic	0.3181818181818182
3	47555545	47555586	TTA	ELP6	upstream	0.26666666666666666
1	1531153	1531457	CAGAGA	FNDC10	downstream	0.32
20	9135387	9135473	TTTCC	PLCB4	intronic	0.631578947368421
5	64163776	64163798	TTG	CWC27	intronic	0.5714285714285714
8	144404800	144405165	CACG	TOP1MT	intronic	0.2
4	2449429	2449875	TGGA	CFAP99	intronic	2.064814814814815
19	36335382	36335537	TTAGGG	NPHS1	intronic	0.4444444444444444
1	207540321	207540372	TATG	CD55	downstream	0.5714285714285714
9	136862854	136863033	TCCA	VAV2	upstream	0.1016949152542373
13	41635041	41635092	CCG	WBP4	UTR	0.9333333333333333
X	47467619	47467732	GGAA	SYN1	intronic	0.46875
19	55332473	55332689	TAGA	KIR3DL1	intronic	0.6666666666666666
17	54993934	54994006	GGAA	TRIM25	upstream	0.625
10	134634306	134634361	CTGTG	CFAP46	intronic	1.5454545454545454
14	45276044	45276204	GAAA	LINC02302	upstream	0.17721518987341772
1	169324077	169324167	TATAA	NME7	intronic	0.6153846153846154
6	42429191	42429260	TAGA	TRERF1	upstream	0.29411764705882354
16	31346001	31346076	TTTC	ITGAM	downstream	1.3846153846153846
16	7236481	7236651	CATATA	RBFOX1	intronic	0.35
11	116701905	116702086	TTTC	APOC3	intronic	0.2909090909090909
10	123944186	123944267	TATG	TACC2	intronic	0.29411764705882354
1	24220935	24220999	GGAA	CNR2	intronic	0.5
11	1149513	1149692	CTCA	MUC5AC	upstream	0.45454545454545453
9	119761792	119761827	TTTC	ASTN2	intronic	0.6666666666666666
6	13711682	13711708	CTG	RANBP9	exonic	0.6666666666666666
2	10569636	10569813	TGGA	HPCAL1	downstream	0.2542372881355932
10	100554747	100554847	GGAA	HPSE2	intronic	0.3181818181818182
X	128909907	128909941	TTAA	SASH3;XPNPEP2	upstream	0.5
20	30461488	30461674	GAAA	TTLL9	intronic	0.234375
11	93239022	93239062	ATG	SMCO4	intronic	0.25
16	26151719	26151768	ATG	HS3ST4	downstream	8.457142857142857
6	157747194	157747233	ATG	TMEM242	downstream	0.5
8	145638477	145638611	CCCCG	SLC39A4	intronic	0.2857142857142857
2	197880335	197880485	TGG	ANKRD44	exonic	0.11904761904761904
7	66777660	66777774	AAATG	STAG3L4	intronic	0.15384615384615385
21	42206335	42206395	TAA	DSCAM	intronic	0.2
1	233528656	233528746	GAAA	MAP3K21	downstream	0.5
12	32808712	32808756	TTCA	FGD4	downstream	0.2727272727272727
18	37266938	37267013	TTTTA	MIR924HG	intronic	0.26666666666666666
1	237678972	237679000	TTCC	RYR2	intronic	0.5283018867924528
X	2568105	2568477	TGGA	CD99P1	intronic	0.5
10	30900455	30900499	GGAA	LYZL2	downstream	1.6666666666666667
12	49077494	49077535	TAAA	KANSL2;CCNT1	upstream	0.38461538461538464
2	72658614	72658668	TCTA	EXOC6B	intronic	0.26666666666666666
10	108566935	108566972	GGAA	SORCS1	intronic	1.3333333333333333
15	83157098	83157288	GGAAA	GOLGA2P10;GOLGA6L17P;LOC727751	intronic	0.2571428571428571
8	56361715	56361743	TTTA	XKR4	intronic	0.3333333333333333
17	32126373	32126550	TTTC	ASIC2	intronic	0.26666666666666666
22	37395555	37395643	GGGGA	TEX33	intronic	0.375
X	37648782	37648806	TAAA	CYBB	intronic	0.7142857142857143
11	84221137	84221168	TTA	DLG2	intronic	0.5
20	20622747	20622831	GGGGA	RALGAPA2	intronic	0.6
2	241864125	241864293	CCCTAA	CROCC2	intronic	0.6363636363636364
16	85184885	85184973	TCTCTG	LINC02139	upstream	0.3333333333333333
8	126328831	126329013	TTCC	NSMCE2	intronic	0.4528301886792453
8	32124608	32124725	GGAA	NRG1	intronic	0.1935483870967742
1	95551358	95551381	TTTTC	TMEM56	upstream	0.6666666666666666
8	12935476	12935705	TTTC	DLC1	downstream	1.1020408163265305
1	11099556	11099736	TGGA	MASP2	intronic	0.2826086956521739
17	7281550	7281647	GAAA	TNK1	upstream	0.37142857142857144
16	12474572	12474702	CCCA	SNX29	intronic	0.5277777777777778
X	32353740	32353885	CATATA	DMD	intronic	0.3333333333333333
15	90600922	90600958	TAA	ZNF710	intronic	0.35714285714285715
15	98333527	98333665	TAGA	LINC00923	intronic	0.1111111111111111
5	131642136	131642158	TTG	SLC22A4	intronic	0.6875
11	77404809	77404849	TTTA	RSF1	intronic	0.36363636363636365
16	21686374	21686494	TTTC	OTOA	upstream	0.23333333333333334
20	48128694	48129053	TGGA	PTGIS	intronic	0.9662921348314607
17	4756615	4756787	GTGTG	MINK1	intronic	0.5483870967741935
11	122854203	122854277	GAAAA	BSX	upstream	1.05
22	28557711	28557745	CAGGA	TTC28	intronic	2.4285714285714284
19	3171606	3171782	TTGGGG	S1PR4;GNA15	upstream	0.8333333333333334
3	25172372	25172552	TTA	RARB	intronic	1.3404255319148937
11	2449668	2449820	TGG	TRPM5	upstream	0.17647058823529413
7	66005940	66006099	GAAA	GS1-124K5.11	intronic	0.1794871794871795
1	110622671	110622863	CATTC	ALX3;LINC01397	upstream	0.17647058823529413
12	53311664	53311845	GAA	KRT8	intronic	0.9629629629629629
17	3688756	3688851	GGAA	ITGAE	intronic	0.16
17	76346771	76346811	TTCC	LOC101928674;SOCS3	downstream	1.2413793103448276
13	72308764	72308937	CATATA	DACH1	intronic	0.46153846153846156
8	26632688	26632746	ACTG	ADRA1A	intronic	0.34782608695652173
7	4931346	4931525	TCTA	RADIL	upstream	1.0
19	39833078	39833109	CGG	SAMD4B	UTR	0.45454545454545453
4	119123346	119123376	TAG	NDST3	intronic	0.46153846153846156
10	135447808	135447898	GAAA	FRG2B	downstream	1.173913043478261
9	130519881	130519926	ATG	SH2D3C	intronic	1.2307692307692308
17	77464698	77464875	TAGA	RBFOX3	intronic	0.11904761904761904
14	97980726	97980814	TTCC	LINC02325	intronic	1.7352941176470589
22	46378703	46378901	TGGA	WNT7B	upstream	0.16326530612244897
2	122431544	122431590	GGAA	NIFK-AS1	intronic	0.625
9	95973262	95973673	CTCA	WNK2	intronic	0.5849056603773585
2	161282700	161282881	GAAA	RBMS1	intronic	0.14893617021276595
4	157746745	157746805	GAA	PDGFC	intronic	0.47619047619047616
3	192134273	192134347	TGAA	FGF12	intronic	0.38461538461538464
16	4970283	4970372	GAAA	PPL	intronic	0.2
11	70638189	70638552	CCAA	SHANK2	intronic	0.0449438202247191
9	109789969	109790153	TATATG	LOC340512	intronic	0.75
12	13153087	13153234	CGG	HEBP1	exonic	0.1951219512195122
11	10841928	10841958	TAA	LOC101928053	intronic	0.4
1	227166000	227166172	CCCA	COQ8A	intronic	0.13333333333333333
11	20174687	20174724	CAAA	DBX1	downstream	1.8
13	113369672	113369772	CACCT	ATP11A	intronic	0.13725490196078433
16	88584082	88584261	TGGA	ZFPM1	intronic	0.15555555555555556
12	130534739	130534900	CTATT	LINC02418	downstream	0.1724137931034483
15	27390742	27390811	TCTA	GABRG3	intronic	0.42857142857142855
17	26368812	26368931	CGG	NLK	upstream	0.26666666666666666
21	45823413	45823725	CATA	TRPM2	intronic	0.1643835616438356
15	38351166	38351229	CACG	LINC02345	intronic	0.4444444444444444
3	13910395	13910438	GGAA	WNT7A	intronic	1.6153846153846154
7	100476502	100476564	TTTTC	SRRT	intronic	1.25
14	91510612	91510792	GAAA	RPS6KA5	intronic	0.375
18	67276722	67276748	TAAA	DOK6	intronic	0.45454545454545453
11	89573842	89574006	TTATA	TRIM53AP	upstream	0.46808510638297873
17	71220990	71221170	CAGGA	FAM104A	intronic	0.6567164179104478
18	65443561	65443606	TATATG	LOC643542	intronic	0.8888888888888888
16	87237584	87237632	TAA	LOC101928708	upstream	0.3
17	6325152	6325226	GAAAA	AIPL1	intronic	0.4
10	11927430	11927600	GGATG	PROSER2-AS1	intronic	1.4193548387096775
10	45423632	45423938	TCCA	TMEM72-AS1	intronic	0.7428571428571429
2	54067683	54067870	GGGGA	GPR75-ASB3	intronic	0.47368421052631576
15	56162056	56162092	TAAA	NEDD4	intronic	0.3333333333333333
7	101504007	101504073	TTCC	CUX1	intronic	1.037037037037037
4	138493426	138493456	TTG	LINC02172	intronic	1.5833333333333333
11	95833446	95833467	TTG	MAML2	intronic	3.5
6	167587029	167587091	GAAA	TCP10L2	intronic	0.8947368421052632
17	39246254	39246380	GAAA	KRTAP4-7;KRTAP4-8	downstream	0.16129032258064516
14	55120015	55120071	TTA	SAMD4A	intronic	0.25
7	43684295	43684360	TAGA	COA1	intronic	0.5555555555555556
12	13109055	13109224	TTTC	GPRC5D	intronic	0.4523809523809524
10	50394023	50394187	GAA	C10orf128	intronic	0.2153846153846154
11	122708152	122708312	TGGA	CRTAM	upstream	0.7804878048780488
10	7779453	7780148	TTATA	ITIH2	intronic	0.3953488372093023
19	4342054	4342078	GAAAA	MPND;STAP2	intronic	0.4
18	5488557	5488606	TAA	EPB41L3	intronic	0.4117647058823529
2	113878537	113878714	TTC	IL1RN	intronic	0.09333333333333334
3	13973144	13973287	CCA	FGD5P1;TPRXL	upstream	0.15217391304347827
14	56046971	56046998	CGG	KTN1	UTR	0.6
1	76306366	76306387	TAAAA	MSH4	intronic	0.8
15	59274458	59274560	TTC	RNF111	intronic	0.3023255813953488
20	61692474	61692732	TCCTG	LINC01749	intronic	0.2765957446808511
22	32609450	32609548	CATATA	RFPL2;SLC5A4	intronic	1.0
6	29698992	29699058	TAGA	HLA-F-AS1	intronic	0.35294117647058826
6	99401952	99401994	TTTA	FBXL4	upstream	0.6071428571428571
15	26376958	26377032	TTCC	LINC00929	intronic	0.42105263157894735
1	8404852	8405030	TCCA	RERE;SLC45A1	downstream	0.075
1	148837208	148837288	TATG	NBPF25P	upstream	0.38461538461538464
1	222724232	222724307	TAGA	HHIPL2;TAF1A	upstream	0.19047619047619047
X	64962518	64962673	TTCC	MSN	downstream	0.17073170731707318
12	124824018	124824179	CCCA	NCOR2	intronic	0.15789473684210525
X	139173477	139173522	CGG	LOC389895	upstream	0.7272727272727273
6	161833260	161833426	CTCA	PRKN	intronic	0.35
17	78815606	78815843	CACCT	RPTOR	intronic	0.37209302325581395
3	60191877	60191906	TAA	FHIT	intronic	1.5454545454545454
12	118021085	118021098	TGGG	KSR2	intronic	1.1428571428571428
9	140398361	140398559	GAA	PNPLA7	intronic	0.16831683168316833
10	126299375	126299624	ATGGTG	LHPP	intronic	1.0588235294117647
16	66414618	66414645	TGG	CDH5	intronic	0.6666666666666666
17	71158884	71158923	GAAA	SSTR2	downstream	2.1
16	88586449	88587551	TGGA	ZFPM1	intronic	0.057034220532319393
7	66381170	66381228	TTA	TMEM248;LOC644794	downstream	0.29411764705882354
2	70995434	70995600	CCCCG	ADD2;FIGLA	upstream	0.17857142857142858
15	69647607	69647773	TTTC	PAQR5	intronic	0.13513513513513514
8	143583663	143583700	TGG	ADGRB1	intronic	0.3939393939393939
11	104755874	104756034	GAAA	CASP12	downstream	0.1
8	63493661	63493730	TAAAA	NKAIN3	intronic	0.3125
1	34107982	34108008	CAAA	CSMD2	intronic	1.6
8	106889846	106890017	TATAA	ZFPM2-AS1	intronic	0.4411764705882353
1	156880829	156881012	TTTC	PEAR1	intronic	1.0327868852459017
10	99164509	99164563	TAGA	RRP12	intronic	0.3333333333333333
20	58214061	58214237	TGGA	PHACTR3	intronic	3.697674418604651
7	932798	932984	TGG	GET4	intronic	0.4788732394366197
1	228507002	228507181	TCCA	OBSCN	intronic	0.9285714285714286
2	74180406	74180443	TCG	DGUOK	intronic	1.0
19	434215	434308	TGAG	SHC2	intronic	0.5833333333333334
16	9057784	9057822	CGAG	USP7	intronic	0.6666666666666666
4	164816129	164816320	CATATA	MARCH1	intronic	0.3076923076923077
2	165999233	165999276	TTG	SCN3A	intronic	0.2857142857142857
6	29917370	29917401	TATG	HLA-A	downstream	0.5833333333333334
7	151901676	151901746	TAGA	KMT2C	intronic	0.2222222222222222
14	55351490	55351519	CAA	GCH1	intronic	0.38461538461538464
8	118986006	118986150	GGAAA	EXT1	intronic	0.75
16	80230701	80230737	CAA	LOC102724084	intronic	17.428571428571427
14	29221802	29221852	CATATA	FOXG1-AS1	intronic	0.8571428571428571
1	41666169	41666211	TAA	SCMH1	intronic	0.5714285714285714
1	156857037	156857149	TCCC	PEAR1;NTRK1	downstream	0.2857142857142857
10	74028706	74028804	TTCC	DDIT4	upstream	0.21739130434782608
3	77080812	77080877	TATAA	ROBO2	intronic	2.642857142857143
6	29791271	29791299	TTAAA	HLA-G	upstream	0.5555555555555556
11	55053729	55053869	GAAA	TRIM51HP	upstream	0.1388888888888889
16	3201830	3201894	TAAAA	CASP16P;ZNF213	downstream	0.3333333333333333
X	48170512	48170538	TTA	SSX9	downstream	0.5
1	115876264	115876449	TTTC	NGF	intronic	1.0925925925925926
17	21454945	21455057	CGGGG	C17orf51	intronic	0.23529411764705882
19	17747476	17747556	CAACC	UNC13A	intronic	0.5833333333333334
4	110160425	110160509	TTATA	COL25A1	intronic	0.3125
15	71152344	71152404	CCCCAG	LRRC49	exonic	0.6666666666666666
5	95263352	95263541	CATA	ELL2	intronic	0.30612244897959184
7	144294215	144294265	TAAA	TPK1	intronic	0.38461538461538464
9	9019260	9019362	GAAA	PTPRD	intronic	0.24
2	11746884	11746926	TTA	GREB1	intronic	0.7857142857142857
14	52188410	52188494	GGAA	FRMD6	intronic	0.32142857142857145
2	145133354	145133528	GAAA	ZEB2	downstream	0.1724137931034483
4	57552231	57552338	TATAA	HOPX	upstream	2.28
6	111844279	111844306	TTTG	TRAF3IP2-AS1	intronic	0.4444444444444444
20	50178034	50178069	CAAG	NFATC2	intronic	1.9
9	132931520	132931582	TTCC	NCS1	upstream	1.2195121951219512
10	24078827	24079284	CATATA	KIAA1217	intronic	0.3246753246753247
1	165552445	165552626	CATATA	LOC400794	downstream	0.3684210526315789
11	106143583	106143807	TATAA	LOC101928535	downstream	2.0864197530864197
1	1194391	1194557	CGTG	UBE2J2	intronic	0.10810810810810811
16	3033523	3033576	TAA	LINC00514;PKMYT1	upstream	0.2222222222222222
X	15707332	15707352	CTTG	CA5BP1	intronic	0.8
14	94985283	94985462	TGG	SERPINA12	upstream	0.3389830508474576
12	6478403	6478546	CCTG	SCNN1A	intronic	0.29411764705882354
9	140335582	140335710	CAGCC	ENTPD8	intronic	0.18181818181818182
11	402183	402366	CCCCG	PKP3	intronic	0.5365853658536586
22	46815700	46815871	CACG	CELSR1	intronic	0.65625
1	44337358	44337533	GGATG	ST3GAL3	intronic	0.45454545454545453
1	229704160	229704207	TAA	ABCB10	upstream	0.3125
12	65666162	65666339	TTTC	MSRB3	upstream	0.3111111111111111
11	435295	435474	TATAG	ANO9	intronic	0.375
13	76137263	76137316	TATG	UCHL3	intronic	0.21428571428571427
2	38613622	38613645	GAAA	ATL2	upstream	8.714285714285714
17	79502275	79502602	CACCAT	FSCN2	intronic	0.22666666666666666
4	88535914	88535992	TAG	DSPP	exonic	0.9411764705882353
20	733709	733815	GAAA	SLC52A3	downstream	0.24242424242424243
1	160905932	160905975	TTC	LOC101928372	intronic	1.0625
21	44756954	44757134	CACCAT	LINC00322	upstream	0.375
22	26219072	26219164	TGGA	MYO18B	intronic	0.21052631578947367
15	51282541	51282573	TTA	AP4E1	intronic	0.1875
11	113230767	113230803	TTTTG	TTC12	intronic	0.5714285714285714
10	52213513	52213534	GGAA	SGMS1	intronic	1.5238095238095237
2	241579441	241580161	TTCC	GPR35	downstream	2.006153846153846
7	140915107	140915139	TTA	TMEM178B	intronic	0.4666666666666667
4	7692161	7692469	TGGA	SORCS2	intronic	1.3870967741935485
20	58622548	58622601	ATG	C20orf197	upstream	0.1875
X	47579209	47579287	TAA	CXXC1P1	intronic	0.14285714285714285
16	66907537	66907580	TCC	PDP2	upstream	1.0909090909090908
7	136658340	136658518	ATGGTG	LOC349160	intronic	0.5263157894736842
9	95973705	95974066	CTCA	WNK2	intronic	1.1666666666666667
X	96412315	96412366	TAA	DIAPH2	intronic	0.16666666666666666
5	175626488	175626677	CGGGG	LOC643201	upstream	0.16666666666666666
12	132867881	132868235	CACAC	GALNT9	intronic	0.21311475409836064
13	107935965	107936008	TTTA	FAM155A	intronic	0.2727272727272727
9	119613750	119613810	TCTA	ASTN2	intronic	0.35294117647058826
6	37194016	37194045	TTTTG	TMEM217	intronic	0.4
1	203468998	203469600	CCA	OPTC	intronic	0.1453287197231834
17	7788013	7788053	GGA	NAA38	intronic	0.7142857142857143
7	44033949	44034063	GAAA	POLR2J4	intronic	0.53125
19	9221962	9222108	TTTC	OR7G2;OR7G1	downstream	0.21052631578947367
18	74104448	74104729	TGGG	ZNF516	intronic	0.1694915254237288
19	4185286	4185429	TGGG	ANKRD24	intronic	0.4
5	175802079	175802368	TCCA	ARL10;MIR1271;NOP16	UTR	0.06666666666666667
20	1201987	1202140	TTTC	RAD21L1	upstream	0.10256410256410256
11	93276401	93276481	CCG	SMCO4	UTR	0.5925925925925926
3	10915525	10915701	CTATG	SLC6A11	intronic	0.5294117647058824
14	65419292	65419323	GAAA	CHURC1-FNTB;RAB15	intronic	0.75
2	5807882	5808065	GAAA	LINC01248	intronic	0.22972972972972974
15	75788035	75788089	CAA	PTPN9	intronic	0.8947368421052632
4	94328853	94329029	TCC	GRID2	intronic	0.09259259259259259
21	41804132	41804167	TAAA	DSCAM	intronic	0.6
6	146195337	146195375	TAA	LOC100507557	intronic	0.42857142857142855
1	111153640	111153693	GGAA	KCNA2	intronic	0.4666666666666667
15	77287490	77287513	CCTG	PSTPIP1	UTR	0.7142857142857143
7	87177430	87177606	GGGAA	ABCB1	intronic	0.3225806451612903
2	231870067	231870246	CCA	SPATA3	intronic	4.67
5	131303361	131303392	TAA	ACSL6	intronic	0.36363636363636365
14	39650629	39650800	TAG	PNN	exonic	0.3090909090909091
15	74188483	74188647	ATGGTG	TBC1D21	downstream	0.5
10	133964111	133964530	TCCA	JAKMIP3	intronic	0.4787234042553192
2	25447548	25447599	TTA	DNMT3A	downstream	0.26666666666666666
18	74730049	74731039	TCCA	MBP	intronic	0.08296943231441048
20	57840352	57840532	TTCC	ZNF831	downstream	1.0285714285714285
12	10392000	10392176	TTCC	KLRD1	intronic	0.4375
1	203723072	203723248	GGAA	ATP2B4	downstream	0.3684210526315789
16	14724054	14724167	CGG	PARN	UTR	0.15151515151515152
1	147698915	147698946	GAAA	LOC101927468	intronic	2.125
4	4771835	4771906	CAT	LOC101928279	downstream	0.23529411764705882
12	129363915	129364010	TTTC	GLT1D1	intronic	1.037037037037037
16	12113440	12113483	TAGA	SNX29	intronic	0.2962962962962963
8	947813	947974	CATA	DLGAP2	intronic	0.16216216216216217
21	32732120	32732197	GGAA	TIAM1	intronic	0.35
7	95204425	95204496	TAAA	PDK4	downstream	0.38461538461538464
2	241987329	241987501	TCCTG	SNED1	intronic	0.4666666666666667
4	187313239	187313263	CAG	F11-AS1	intronic	1.1428571428571428
12	692247	692424	CATG	NINJ2	intronic	0.11627906976744186
16	57027016	57027083	CATATA	NLRC5	intronic	0.5
5	54288296	54288560	TAGA	ESM1	intronic	0.20967741935483872
10	118332625	118332800	GAAA	PNLIP	upstream	0.5272727272727272
16	2214142	2214197	CGTG	TRAF7	intronic	0.5
5	179540535	179540723	TGGA	RASGEF1C	intronic	0.32075471698113206
19	41399166	41399239	TCTA	CYP2G1P	intronic	0.2777777777777778
1	1540759	1540980	GTGTG	FNDC10;MIB2	upstream	0.46153846153846156
3	56066893	56067115	GAAA	ERC2	intronic	0.22807017543859648
16	22127153	22127295	GGAA	VWA3A	intronic	0.7037037037037037
10	53491773	53491823	TTCC	PRKG1	intronic	0.42857142857142855
7	1276066	1276087	CCG	UNCX	exonic	0.875
19	51826151	51826601	TCTCTG	IGLON5	intronic	0.746268656716418
9	86546783	86546953	GAAA	C9orf64	downstream	0.21428571428571427
13	78956150	78956224	CACG	RNF219-AS1	intronic	0.6153846153846154
19	4036156	4036338	CATA	PIAS4	intronic	0.49019607843137253
1	3642756	3642939	TGGA	TP73	intronic	0.2558139534883721
21	29552336	29552394	TAGA	LINC01695	intronic	0.35294117647058826
15	25612427	25612462	TTAAA	SNHG14	intronic	0.5714285714285714
10	61864146	61864187	GAAAA	ANK3	intronic	2.125
19	442759	444206	TGGA	SHC2	intronic	0.4339622641509434
16	88087743	88088052	CCA	BANP	intronic	0.07216494845360824
7	146643151	146643257	TTCC	CNTNAP2	intronic	0.14814814814814814
3	37295981	37296028	TTAA	GOLGA4	intronic	0.4444444444444444
3	38626833	38627008	TGGA	SCN5A	intronic	0.11428571428571428
10	135356155	135356340	TTTC	CYP2E1	intronic	0.16279069767441862
3	56855990	56856082	GAGAA	ARHGEF3	intronic	0.3157894736842105
22	25028979	25029200	TCTG	BCRP3	exonic	0.125
22	25744964	25745115	CAGCC	LRP5L	downstream	0.6875
2	231153170	231153243	TTTC	SP140	intronic	0.19047619047619047
7	47651958	47652005	GAA	LINC01447	upstream	0.47058823529411764
7	1746588	1746693	CATG	ELFN1	intronic	0.23809523809523808
19	9011983	9012055	TAAAA	MUC16	intronic	0.2857142857142857
3	157946716	157946890	CATA	RSRC1	intronic	1.3953488372093024
12	131110840	131110910	CCA	RIMBP2	intronic	0.4444444444444444
13	34073633	34073816	TTC	STARD13	intronic	1.1066666666666667
3	121303051	121303120	GGAA	ARGFX	intronic	0.3684210526315789
2	234085167	234085224	ATG	INPP5D	intronic	0.8602150537634409
11	1022952	1023119	TGAA	MUC6	intronic	0.21052631578947367
10	61064521	61064631	GGGAA	FAM13C	intronic	0.24
10	96291619	96291672	TTATG	TBC1D12	intronic	2.6923076923076925
11	120746831	120747198	CCA	LOC101929227	intronic	0.04597701149425287
19	41882060	41882096	CAA	TMEM91	intronic	0.7777777777777778
10	1675718	1675840	TCTA	ADARB2	intronic	0.325
5	1222228	1222404	TATG	SLC6A19	UTR	0.17142857142857143
X	1596117	1596189	TCTA	P2RY8	intronic	0.30434782608695654
6	154675381	154675804	CCA	IPCEF1	intronic	0.35036496350364965
11	114264896	114265033	TTTTC	C11orf71	intronic	0.41379310344827586
10	43363057	43363139	TATG	LOC101929445	upstream	0.6428571428571429
17	10200870	10200897	ATGGTG	MYH13	intronic	1.4
X	6020676	6020823	CATA	NLGN4X	intronic	0.10810810810810811
22	18563929	18564044	CATATA	PEX26	intronic	0.5
19	10082729	10083155	TTCA	COL5A3	intronic	0.06
8	27517865	27517933	TAGA	SCARA3	intronic	0.29411764705882354
10	134171809	134171970	CGGAG	LRRC27	intronic	1.1428571428571428
4	12247910	12248021	TCTA	LINC02270	intronic	0.19230769230769232
12	41790193	41790231	TTG	PDZRN4	intronic	0.3076923076923077
22	49153238	49153275	GGA	FAM19A5	intronic	1.8867924528301887
9	35184754	35184777	GGAA	UNC13B	intronic	0.84
7	14209759	14209829	GAAA	DGKB	intronic	2.473684210526316
X	134249531	134249751	TATAA	SMIM10L2B-AS1;ETDB	intronic	0.6090225563909775
X	2618825	2619145	TCCA	CD99	intronic	1.1898734177215189
8	133979156	133979510	TCCA	TG	intronic	0.10588235294117647
7	101035135	101035177	TTTTC	COL26A1	intronic	0.36363636363636365
6	167197244	167197425	CATA	RPS6KA2	intronic	0.4
16	4276894	4277608	TGGA	SRL	intronic	0.9213483146067416
20	15470776	15470928	TTCC	MACROD2	intronic	0.13513513513513514
19	33916203	33916230	CAAA	PEPD	intronic	0.375
5	11641751	11641934	CATATA	CTNND2	intronic	0.5333333333333333
2	201495249	201495346	GGAA	AOX1	intronic	0.6086956521739131
21	47400837	47401022	TCTCTG	COL6A1;LOC101928796	upstream	1.425531914893617
5	140217200	140217240	TTCC	PCDHA1;PCDHA2;PCDHA3;PCDHA4;PCDHA5;PCDHA6;PCDHA7	intronic	1.5454545454545454
14	39699490	39699532	TTA	MIA2	intronic	0.5
2	116430197	116430337	TTTC	DPP10	intronic	0.1282051282051282
11	36183125	36183156	TGGA	LDLRAD3	intronic	0.5
2	216799344	216799417	TCTA	MREG	downstream	0.391304347826087
1	186826445	186826707	TATAA	PLA2G4A	intronic	1.8085106382978724
10	118885962	118886088	CCTCG	SHTN1	UTR	0.5405405405405406
7	50781642	50781812	CCA	GRB10	intronic	0.08
11	1914603	1915081	TGGA	LINC01150;LSP1	upstream	0.06086956521739131
19	46834011	46834162	TGGA	HIF3A	intronic	1.3818181818181818
6	148628153	148628265	TTTC	SASH1	intronic	0.18518518518518517
X	129884297	129884479	TCTG	ENOX2	intronic	0.37209302325581395
7	134781294	134781376	TAGA	AGBL3;C7orf49	intronic	0.3103448275862069
17	65658110	65658134	TAA	PITPNC1	intronic	0.5
2	1521328	1521499	CTG	TPO	intronic	0.6904761904761905
1	69653113	69653161	TAGA	LINC01707	downstream	0.5517241379310345
11	69058889	69058897	CACCAT	MYEOV	upstream	0.42857142857142855
12	109253626	109253805	GGGGA	SSH1	intronic	0.21875
1	790590	790735	TATG	LINC01128	exonic	0.12121212121212122
1	63643031	63643210	GAAA	LINC00466	downstream	0.2765957446808511
2	10069271	10069303	TTG	TAF1B	intronic	0.5
3	9916202	9916240	TAA	CIDEC	intronic	0.43478260869565216
17	7788343	7788399	CCG	CHD3	exonic	0.2
19	16332992	16333024	TTA	AP1M1	intronic	0.5
8	102635887	102636167	CAGTA	GRHL2	intronic	0.41379310344827586
16	61886756	61886849	TTCC	CDH8	intronic	0.32
4	169474837	169474861	TTG	PALLD	intronic	1.1764705882352942
1	7531221	7531266	TCTG	CAMTA1	intronic	0.38461538461538464
1	71186208	71186329	TTCC	LINC01788	intronic	0.13793103448275862
11	71918330	71918417	GGAA	FOLR2	intronic	0.3
2	20554330	20554356	CAA	PUM2	upstream	1.6363636363636365
7	117179835	117179914	TAA	CFTR	intronic	0.32
16	6780403	6780574	TCTA	RBFOX1	intronic	0.34146341463414637
19	17204825	17204863	TTG	MYO9B	intronic	0.6363636363636364
1	14978934	14979017	CCCA	KAZN	intronic	0.5783132530120482
7	132246038	132246216	TCC	PLXNA4	intronic	0.33783783783783783
9	129824299	129824357	TATG	RALGPS1	intronic	0.35714285714285715
11	6677055	6677083	TCCCC	DCHS1	UTR	1.0
8	41461415	41461444	TGAA	GPAT4	intronic	0.4
14	93860697	93860774	TTTTA	UNC79	intronic	0.3125
7	48673491	48673588	TAGA	ABCA13	intronic	0.15384615384615385
5	173908872	173908975	GGAA	LINC01411	intronic	0.17857142857142858
9	136703459	136703561	TGGA	VAV2	intronic	1.0
20	4894254	4894277	TTG	SLC23A2	intronic	0.5
5	45376127	45376303	TATAA	HCN1	intronic	4.604651162790698
6	160877712	160877892	TGG	LPAL2;SLC22A3	intronic	0.2638580931263858
11	3152575	3153281	TCCA	OSBPL5	intronic	0.08947368421052632
16	86526179	86526231	ATG	FENDRR	intronic	1.0
14	96882044	96882168	TTAA	AK7	intronic	0.17142857142857143
6	149270428	149270471	TAA	UST	intronic	0.4666666666666667
7	44924903	44924998	CCG	PURB	exonic	0.5151515151515151
10	117287406	117287582	TTCC	ATRNL1	intronic	0.6779661016949152
12	128805683	128805725	TAA	TMEM132C	intronic	0.26666666666666666
14	72537561	72537613	TATG	RGS6	intronic	0.5
11	690228	690381	GGGGA	DEAF1	intronic	0.2558139534883721
12	40290248	40290424	TATG	SLC2A13	intronic	0.30357142857142855
4	25864593	25864640	CCG	SEL1L3	intronic	0.6176470588235294
17	78007136	78007168	TTG	TBC1D16	intronic	0.6
2	212867820	212867991	GAAA	ERBB4	intronic	0.42105263157894735
5	8365459	8365533	TAA	LINC02226	intronic	0.2777777777777778
16	7435916	7435969	TTTA	RBFOX1	intronic	0.3125
2	113775356	113775401	GGA	IL36A;IL36B	downstream	0.8
1	2942632	2942808	ATG	ACTRT2	downstream	0.18055555555555555
17	81180025	81180132	TTAGGG	RPL23AP87	intronic	0.29411764705882354
3	2576503	2576539	CTG	CNTN4	intronic	0.6
6	154650751	154650788	GAAA	IPCEF1	intronic	0.7916666666666666
17	46342863	46342895	CAAG	SKAP1	intronic	0.42857142857142855
22	50495688	50495875	TTGGGG	TTLL8	upstream	0.5161290322580645
19	351699	351872	CATA	MIER2	upstream	0.31746031746031744
8	3269188	3269290	CATATA	CSMD1	intronic	4.6
6	148646397	148646430	TTG	SASH1	intronic	0.25
3	20063682	20063776	GAAA	PP2D1	downstream	0.25
11	117967561	117967746	GAAA	TMPRSS4	intronic	0.30666666666666664
14	103385894	103386236	TCCA	AMN;TRAF3	upstream	0.2931937172774869
19	54409279	54409373	TCC	PRKCG	intronic	0.48
16	80377570	80377628	GAAAA	LOC102724084	intronic	0.6666666666666666
2	61614792	61615020	CATATA	USP34	intronic	0.2
17	32601834	32601936	GGAGAA	CCL7	downstream	0.5294117647058824
19	44454816	44454840	TAA	ZNF221	upstream	0.6
8	93124893	93124971	GAAAA	RUNX1T1	upstream	0.5714285714285714
17	68088630	68088753	TAGA	KCNJ16	intronic	0.12903225806451613
14	31091547	31091582	CAG	SCFD1	exonic	0.4444444444444444
8	9481527	9481550	CAA	TNKS	intronic	0.4444444444444444
8	39861923	39862105	TAGA	IDO2	intronic	0.08695652173913043
1	109138171	109138216	GGGA	FAM102B	intronic	0.6363636363636364
18	12094332	12094519	GGGTG	ANKRD62	intronic	1.0857142857142856
1	8381683	8381746	TGGG	SLC45A1	intronic	0.5714285714285714
5	3586620	3586792	ATGGTG	IRX1	upstream	0.4642857142857143
X	1433371	1433544	CACCC	CSF2RA	downstream	1.263157894736842
1	20996030	20996078	TAA	KIF17	intronic	0.2222222222222222
20	60140106	60140266	TGG	CDH4	intronic	0.39436619718309857
9	140412775	140412945	CTCA	PNPLA7	intronic	1.26
5	147290771	147290840	CTATT	C5orf46	upstream	0.4375
19	3850721	3850755	CAA	MIR1268A	intronic	0.3333333333333333
4	62294534	62294663	TCTA	ADGRL3	intronic	0.28125
11	90193286	90193311	TAA	DISC1FP1	intronic	0.7142857142857143
20	25762301	25762485	ATGGTG	FAM182B	intronic	0.26865671641791045
1	119941955	119941980	TTA	HAO2	downstream	0.6
5	95998017	95998050	TCCC	CAST	UTR	0.5714285714285714
18	24282615	24282684	TTCC	PCAT18	intronic	0.2777777777777778
12	86524655	86524776	TTA	MGAT4C	intronic	0.4230769230769231
12	13108829	13109011	TTTC	GPRC5D	intronic	0.3050847457627119
11	62271662	62271700	GAAA	AHNAK	intronic	1.6
12	9771799	9771822	TTTC	LOC374443	downstream	5.9
16	72659875	72659936	GGAA	LINC01572	intronic	0.391304347826087
17	76536416	76536482	TGGA	DNAH17	intronic	1.2352941176470589
9	9584359	9584380	TTA	PTPRD	intronic	1.1428571428571428
9	78163635	78163782	TTCC	MIR548H3	upstream	0.20588235294117646
17	4756063	4756251	TGGG	MINK1	intronic	0.978494623655914
6	25297111	25297162	TCTA	CARMIL1	intronic	0.6923076923076923
8	42995527	42995660	CGG	HGSNAT	exonic	0.475
11	45869043	45869089	CGG	CRY2	exonic	0.38461538461538464
16	73091758	73091807	CGG	ZFHX3	intronic	0.3333333333333333
15	91820021	91820067	TTA	SV2B	intronic	0.3125
8	144299948	144300132	CCA	GPIHBP1	downstream	0.16831683168316833
1	112532345	112532412	CCG	KCND3;LINC01750	exonic	0.5454545454545454
3	186431959	186432054	GAAA	KNG1	downstream	0.34210526315789475
5	517767	518134	TCCA	SLC9A3	intronic	1.4074074074074074
11	99279099	99279237	GAAA	CNTN5	intronic	0.18181818181818182
4	22708104	22708142	TAA	GBA3	intronic	0.35714285714285715
10	11326077	11326216	TGGG	CELF2	intronic	0.34285714285714286
12	10005652	10005713	GAAA	CLEC2B	UTR	1.04
5	117876785	117876921	TATATG	LINC02208	intronic	0.9047619047619048
3	165514894	165515074	TTCC	BCHE	intronic	1.5096774193548388
6	21924876	21924957	ATGGTG	CASC15	intronic	1.0
9	129969365	129969488	CAT	RALGPS1	intronic	0.1282051282051282
7	34921630	34921753	TGGA	NPSR1	downstream	0.15625
5	146442519	146442552	GGGA	PPP2R2B	intronic	0.8
2	72569899	72569924	CAA	EXOC6B	intronic	0.6785714285714286
11	118307399	118307429	CGG	KMT2A	exonic	0.6363636363636364
11	80476683	80476722	TAGA	LOC101928944	upstream	0.36363636363636365
12	117227000	117227174	TGGA	RNFT2	intronic	0.1
19	3476941	3477365	TGGA	SMIM24	intronic	0.17857142857142858
10	119812761	119812781	TTCC	CASC2	intronic	3.6666666666666665
7	149744753	149744777	CCG	ACTR3C	intronic	0.6
1	37480435	37480478	TTTTC	GRIK3	intronic	0.4
19	51998373	51998780	TGGA	SIGLEC12	intronic	0.09
5	92919882	92919997	CCCCAG	NR2F1	intronic	0.6428571428571429
20	59985891	59986067	TCCA	CDH4	intronic	2.0
15	48843159	48843190	TGAA	FBN1	intronic	0.5
X	83672158	83672261	GAAA	HDX	intronic	0.17857142857142858
3	134650544	134650833	TATG	EPHB1	intronic	0.057971014492753624
5	3446386	3446667	ATGGTG	LINC01019	intronic	0.2413793103448276
7	38467208	38467262	TTG	AMPH	intronic	0.5
17	56870008	56870023	TTA	PPM1E	intronic	1.0
11	73841174	73841215	GGGAGA	C2CD3	intronic	0.5
7	97871900	97871966	TCCA	TECPR1	intronic	0.6451612903225806
10	134087098	134087165	TGAG	STK32C	intronic	0.2857142857142857
16	3084659	3084714	TTCC	LOC100128770	intronic	0.6
15	85471750	85471870	TTTC	SLC28A1	intronic	0.21428571428571427
15	49591906	49591992	TTTC	GALK2	intronic	0.5454545454545454
14	95889932	95890267	ATGGTG	SYNE3	intronic	0.3492063492063492
11	74439573	74439596	TTG	CHRDL2	intronic	0.5
2	214576848	214576909	TATATG	SPAG16	intronic	0.4
9	119136487	119136525	ATG	PAPPA	intronic	0.8
22	20658739	20658913	TATAA	LOC101927859	intronic	0.53125
14	98042237	98042358	ATG	LINC02325	intronic	0.4406779661016949
3	50877124	50877207	TCCCC	DOCK3	intronic	0.6875
4	1170169	1170503	TTCA	SPON2	intronic	0.06493506493506493
4	173191865	173191922	TAGA	GALNTL6	intronic	0.20588235294117646
2	12593101	12593144	TCCA	MIR3681HG	intronic	0.5
1	3738781	3738824	CAGA	CEP104	intronic	0.6
22	46375795	46375967	CACAA	WNT7B	upstream	0.2903225806451613
7	21829371	21829513	TTTC	DNAH11	intronic	0.13157894736842105
16	6817948	6817989	GAA	RBFOX1	intronic	0.6923076923076923
11	2146229	2146400	TGGA	IGF2;MIR483	downstream	0.3953488372093023
4	165134355	165134402	TTA	MARCH1	intronic	0.5714285714285714
19	15787801	15788303	CTCA	CYP4F12	intronic	0.21951219512195122
11	116809239	116809380	GGGGA	SIK3	intronic	0.24
14	32294787	32294854	TCC	NUBPL	intronic	0.21739130434782608
22	43472758	43472778	TAA	TTLL1	intronic	0.4642857142857143
11	34067798	34067847	TTCC	CAPRIN1	upstream	0.35
4	102027521	102027682	GAAA	PPP3CA	intronic	0.6290322580645161
14	45385802	45385869	CATATA	LOC101927418;C14orf28;KLHL28	upstream	0.7777777777777778
X	41366277	41366295	TATG	CASK	downstream	1.4285714285714286
17	77026519	77026690	TTTC	C1QTNF1	intronic	0.1794871794871795
19	33996857	33996969	CACAC	PEPD	intronic	0.3181818181818182
6	163005805	163005941	TCCCC	PRKN	intronic	0.3181818181818182
1	111696809	111696874	TTTTA	CEPT1	intronic	0.6153846153846154
16	56989743	56989772	TTA	CETP	upstream	0.5833333333333334
X	70270295	70270318	TTG	SNX12	upstream	0.5
1	33837009	33837079	CCA	PHC2	intronic	0.52
4	75720423	75720456	CAA	BTC	upstream	1.1875
8	23192953	23192976	TAAA	LOXL2	intronic	1.0
8	140884491	140884803	TGGA	TRAPPC9	intronic	0.5862068965517241
11	31614774	31614817	TTG	ELP4	intronic	0.6
16	30760322	30760593	TGG	PHKG2	intronic	0.18421052631578946
3	24341260	24341291	TTTA	THRB	intronic	0.625
20	26007933	26008009	GAAA	LOC100134868	downstream	0.7727272727272727
7	696805	696896	TGAA	PRKAR1B	intronic	5.333333333333333
22	33424625	33424700	TGG	SYN3	intronic	1.9375
2	105595953	105596139	GAAA	LOC102724691	intronic	0.17777777777777778
1	201893739	201893869	GAAA	LMOD1	intronic	0.23333333333333334
7	74585022	74585075	GGGGA	NCF1C	intronic	0.36363636363636365
6	123804211	123804264	TTA	TRDN	intronic	0.3125
10	44284958	44285146	CCA	HNRNPA3P1	exonic	0.4146341463414634
11	107688782	107688861	GAAA	SLC35F2	intronic	0.2727272727272727
19	8074416	8074466	TTA	ELAVL1	intronic	0.3333333333333333
7	4233858	4233909	TATG	SDK1	intronic	0.42857142857142855
3	13711008	13711260	CCCA	LINC00620	intronic	0.08196721311475409
10	11653689	11653764	CCG	USP6NL	exonic	0.36
17	9143295	9143318	CGGG	NTN1	UTR	0.7142857142857143
2	54493690	54493711	TAGA	ACYP2	intronic	0.5609756097560976
22	48893535	48893725	CTGGGG	FAM19A5	intronic	0.45714285714285713
8	145825676	145825856	CGTG	ARHGAP39	intronic	0.2631578947368421
1	166572235	166572277	TAAA	FMO9P	upstream	0.7272727272727273
3	87876252	87876262	TTA	HTR1F	upstream	1.2
16	84777652	84777676	TTG	USP10	intronic	1.0
9	79009458	79009509	CCCCG	RFK;RPSAP9	upstream	0.3333333333333333
13	70290282	70290354	TCTA	KLHL1	intronic	0.35714285714285715
13	31098837	31098864	TAA	HMGB1	intronic	1.8888888888888888
1	20934886	20934920	TTTTG	CDA	intronic	0.7272727272727273
10	60381663	60381730	AATAG	BICC1	intronic	0.45454545454545453
20	33814564	33814601	CCG	MMP24	exonic	0.8333333333333334
17	80990229	80990407	CAGAC	B3GNTL1	intronic	0.25
12	63076806	63076866	TTA	PPM1H	intronic	0.2777777777777778
22	43871454	43871637	TGG	MPPED1	intronic	1.0125
11	127149634	127149812	TTC	LOC101929497	intronic	0.22033898305084745
9	114928096	114928276	GAAA	SUSD1	intronic	0.26229508196721313
22	18687406	18687700	TATAA	LOC100996415	intronic	0.2833333333333333
12	108002654	108002790	TAAAA	BTBD11	intronic	0.896551724137931
3	45835884	45836002	TCCA	SLC6A20	intronic	0.47368421052631576
7	157902489	157902681	TGAG	PTPRN2	intronic	0.11904761904761904
5	16796588	16796611	GAAA	MYO10	intronic	2.88
11	41324629	41324675	TCTCCC	LRRC4C	intronic	0.6666666666666666
12	132701653	132701750	CCCA	GALNT9	intronic	0.5238095238095238
8	8183599	8183786	TTA	PRAG1	intronic	0.2702702702702703
4	169076463	169076633	TTATA	ANXA10	intronic	0.9411764705882353
9	136593904	136594315	TGGA	SARDH	intronic	0.05263157894736842
18	23965644	23965679	TTC	TAF4B	intronic	0.3076923076923077
17	56483061	56483134	GAAA	RNF43	intronic	0.2631578947368421
19	1812342	1812450	CGGGG	ATP8B3;LOC100288123;MIR1909;REXO1	upstream	0.25
4	141671261	141671291	TAAAA	TBC1D9	intronic	0.6666666666666666
17	60871627	60871678	CCA	MARCH10	intronic	0.22857142857142856
19	17744970	17745147	TCCA	UNC13A	intronic	4.357142857142857
15	96704996	96705116	TAGA	NR2F2-AS1	intronic	0.12903225806451613
11	44111083	44111112	TTG	EXT2;ACCS	downstream	0.4444444444444444
22	17705313	17705349	CAAA	ADA2	upstream	0.36363636363636365
6	112512073	112512217	TTTC	LAMA4	intronic	0.19444444444444445
5	34074944	34074964	TAAAA	C1QTNF3-AMACR	intronic	1.0
4	173500934	173501021	GGAA	GALNTL6	intronic	0.22727272727272727
6	159689580	159689894	TCTA	FNDC1	intronic	0.8985507246376812
9	27444152	27444332	GGAA	MOB3B	intronic	0.44642857142857145
X	1543391	1543571	TCCA	ASMTL	intronic	0.17777777777777778
8	145560629	145560651	GGGA	SCRT1	upstream	0.7142857142857143
9	101591435	101591488	TCTA	GALNT12	intronic	0.2857142857142857
20	14935710	14935798	TTATA	MACROD2	intronic	0.32432432432432434
4	66331154	66331333	GAAA	EPHA5	intronic	0.16666666666666666
8	19300731	19300808	TATG	CSGALNACT1	intronic	0.2631578947368421
X	131928602	131928632	TTA	HS6ST2	intronic	0.6
Y	24993324	24993345	TTTA	TTTY17A;TTTY17B;TTTY17C	upstream	1.0
9	140335049	140335209	CAGCC	ENTPD8	intronic	0.5357142857142857
3	38432703	38432730	CAA	XYLB	intronic	2.2222222222222223
10	20303096	20303187	TTCC	PLXDC2	intronic	1.68
17	15708330	15708411	TTCC	LINC02087	downstream	0.48
1	1219475	1219611	GGGTG	SCNN1D	intronic	1.2352941176470589
20	62918052	62918276	TTAGGG	LINC00266-1	intronic	0.5882352941176471
2	241718577	241718940	CTCA	KIF1A	intronic	0.24096385542168675
20	35010889	35010920	TTTC	DLGAP4	intronic	1.8
6	35957662	35957697	TTTG	SLC26A8	exonic	0.5714285714285714
8	113795618	113795752	GGAA	CSMD3	intronic	0.17142857142857143
5	149134520	149134632	CATATA	PPARGC1B	intronic	0.21052631578947367
7	29548007	29548027	TTG	CHN2	intronic	1.5
3	183015418	183015457	TTCC	MCF2L2	intronic	0.625
2	42735880	42736039	TATAA	MTA3	intronic	0.1724137931034483
X	1524030	1524142	TGGA	ASMTL-AS1	intronic	0.5517241379310345
20	976849	976908	CATTC	RSPO4	intronic	0.3333333333333333
15	55502361	55502426	TATATG	RAB27A	intronic	1.5
12	119529790	119529874	TGAA	SRRM4	intronic	0.23809523809523808
14	103120252	103120339	TTTC	RCOR1	intronic	0.30434782608695654
4	8036217	8036401	TGGG	ABLIM2	intronic	0.45454545454545453
14	23731543	23731581	TGGA	RNF212B	intronic	0.5
14	105356399	105356572	TGGA	CEP170B	intronic	0.4090909090909091
10	18203284	18203510	TATATG	MRC1	downstream	0.14705882352941177
11	118177195	118177242	TAAA	CD3E	intronic	0.625
16	57739248	57739409	TCCA	DRC7	intronic	0.425
10	72031905	72032031	GAAA	NPFFR1	intronic	0.32075471698113206
13	114243182	114243372	TGG	TFDP1	intronic	0.07142857142857142
5	60403481	60403510	TTA	NDUFAF2	intronic	0.36363636363636365
11	40654875	40654956	TTTC	LRRC4C	intronic	0.23076923076923078
4	17729762	17729840	ATG	FAM184B	intronic	0.4
X	2676979	2677133	TCTA	XGY2	intronic	0.5263157894736842
2	99347634	99347655	CCCCG	MGAT4A	upstream	0.8
15	47635441	47635470	TTA	SEMA6D	intronic	0.46153846153846156
1	51089640	51089715	GAA	FAF1	intronic	0.21428571428571427
19	49172222	49172761	CCA	SEC1P	intronic	0.8222222222222222
10	37893071	37893116	TATATG	MTRNR2L7	upstream	0.7142857142857143
2	242052822	242053006	CATA	PASK	UTR	0.37777777777777777
18	74971310	74971680	TGG	GALR1	intronic	2.2621951219512195
16	12474875	12475523	CCCA	SNX29	intronic	0.15584415584415584
2	39723023	39723174	TTTC	LOC728730	intronic	0.1
3	113136874	113136935	TTTA	CFAP44-AS1	intronic	0.2222222222222222
1	234745870	234745907	CCG	IRF2BP2	downstream	1.2857142857142858
9	126699619	126699662	TAAAA	DENND1A	upstream	0.3157894736842105
13	41235085	41235126	CAA	FOXO1	intronic	0.3076923076923077
1	67594036	67594087	TTTA	C1orf141	intronic	0.625
10	72570584	72570607	CAA	SGPL1	upstream	0.6666666666666666
19	55366496	55366520	ATG	KIR3DL2	intronic	1.5
12	110246512	110247492	TCCA	TRPV4	intronic	0.034782608695652174
17	7015362	7015413	GGGGA	ASGR2	intronic	0.6923076923076923
6	29536135	29536253	TTC	UBD	intronic	0.23255813953488372
5	16936409	16936566	CCCCG	MYO10	upstream	0.14814814814814814
6	146591976	146592158	TTTC	GRM1	intronic	0.13043478260869565
X	16964831	16964929	CGG	REPS2	UTR	0.5454545454545454
19	42699128	42699308	GGGA	DEDD2	downstream	0.25
3	64190238	64190261	CAA	PRICKLE2	intronic	0.875
1	155260780	155260833	TAA	PKLR	intronic	0.26666666666666666
9	114404883	114404933	TAAA	DNAJC25;DNAJC25-GNG10	intronic	0.26666666666666666
18	45036739	45036784	TTG	MIR4527HG	intronic	0.29411764705882354
17	3298663	3298692	TAA	OR1E1	downstream	0.45454545454545453
17	77813078	77813203	CCG	CBX4	UTR	0.4722222222222222
X	16183126	16183176	TTTC	MAGEB17	intronic	0.5
14	45385470	45385631	CATA	LOC101927418;C14orf28;KLHL28	upstream	0.3157894736842105
5	147449125	147449179	TGG	SPINK5	intronic	0.875
8	13436981	13437158	TTATA	DLC1	intronic	0.5319148936170213
15	62449103	62449139	TTTA	C2CD4B	downstream	0.2727272727272727
9	95520486	95520514	TAA	BICD2	intronic	2.0
11	123473009	123473040	TTA	GRAMD1B	intronic	0.36363636363636365
21	35318775	35318902	TTTC	LINC00649	intronic	0.17647058823529413
9	136258487	136258804	TGGG	STKLD1	intronic	1.0694444444444444
19	15971920	15971968	TTTC	LINC01835	intronic	0.1388888888888889
11	63606709	63606813	CGCGG	MARK2	UTR	0.2631578947368421
19	46905448	46905527	GGAA	CCDC8	downstream	0.42105263157894735
12	130925946	130925994	TAA	RIMBP2	intronic	0.29411764705882354
4	13814528	13814714	TTATA	LINC01182	intronic	0.5
12	40933114	40933296	TTTC	MUC19	intronic	0.543859649122807
6	50824197	50824224	TTTA	TFAP2B	downstream	0.5454545454545454
20	32138414	32138442	TTTA	CBFA2T2	intronic	0.4444444444444444
3	6896136	6896252	TCCCC	GRM7	intronic	0.22727272727272727
10	80712092	80712201	TGGA	ZMIZ1-AS1	intronic	0.1875
17	31791467	31791643	TTTC	ASIC2	intronic	1.3111111111111111
12	117565851	117566061	CACGT	TESC-AS1	intronic	0.2857142857142857
4	21530298	21530477	GAAA	KCNIP4	intronic	0.34375
1	233742651	233742677	TAA	KCNK1	upstream	0.7777777777777778
17	42525882	42525965	GAA	GPATCH8	intronic	0.2692307692307692
16	65356897	65357255	TTATA	LINC00922	intronic	0.21176470588235294
11	40377485	40377547	TATAG	LRRC4C	intronic	0.4
22	18716575	18716677	TTATA	LINC01662	upstream	0.48484848484848486
14	69071542	69071569	TGAG	RAD51B	intronic	0.7142857142857143
11	3650529	3650719	CATA	TRPC2	intronic	2.3902439024390243
5	148640246	148640283	TAA	ABLIM3	intronic	0.3076923076923077
14	60048592	60048642	GAAA	CCDC175	upstream	0.13793103448275862
10	128985983	128986043	GAAA	DOCK1;FAM196A	intronic	0.35714285714285715
9	102520645	102520696	CATA	LOC101928438	intronic	0.45454545454545453
21	40756164	40756196	TTA	WRB;WRB-SH3BGR	intronic	0.4444444444444444
18	21917319	21917387	CATAA	OSBPL1A	intronic	0.3333333333333333
7	100789190	100789275	GGAA	AP1S1;SERPINE1	downstream	0.21739130434782608
15	85292029	85292157	CCG	ZNF592	intronic	0.14285714285714285
18	74104947	74105117	TGGG	ZNF516	intronic	0.4772727272727273
7	73468821	73468897	TAGA	ELN	intronic	0.7142857142857143
13	72308956	72309129	CATATA	DACH1	intronic	0.358974358974359
1	241717523	241717598	TTCC	KMO	intronic	0.35
2	131119068	131119171	TTTC	PTPN18	intronic	0.5555555555555556
16	65355815	65355999	TTATA	LINC00922	intronic	0.6086956521739131
19	33155523	33155567	TAA	ANKRD27	intronic	0.3333333333333333
X	48639564	48639719	GAAA	GATA1;GLOD5	upstream	0.1282051282051282
4	71486770	71487275	TTATA	ENAM	upstream	0.21212121212121213
19	48184714	48184844	CAGA	BICRA	intronic	0.5555555555555556
1	15132258	15132302	TAA	KAZN	intronic	0.25
1	114467296	114467382	TCTA	HIPK1-AS1	intronic	0.2631578947368421
12	32295378	32295438	TCTA	BICD1	intronic	0.5652173913043478
2	1217355	1217521	TCTCTG	SNTG2	intronic	0.5555555555555556
12	5344321	5344352	TTA	LINC02443	intronic	0.48
17	566115	566165	CAGG	VPS53	intronic	0.75
17	78718464	78718634	CCCTAG	RPTOR	intronic	0.34615384615384615
5	36068999	36069084	GGAA	UGT3A2	intronic	0.2916666666666667
15	69592912	69593095	TTTC	PAQR5	intronic	2.3684210526315788
12	125894104	125895755	GAGTG	TMEM132B	intronic	0.4053030303030303
20	8812517	8812661	TTTC	PLCB1	intronic	0.18181818181818182
9	132934697	132934840	CCGCG	NCS1	upstream	0.18518518518518517
5	171881547	171881624	CCCG	SH3PXD2B	upstream	0.2857142857142857
13	53029766	53029804	CGG	CKAP2	intronic	0.8888888888888888
12	52908875	52908992	CCG	KRT5	exonic	0.5
2	216813758	216813812	CTA	MREG	intronic	0.375
7	147622246	147622308	GGAA	CNTNAP2	intronic	0.35294117647058826
19	15956251	15956433	GGAGAA	LINC01835;UCA1	downstream	0.125
10	68893064	68893161	CATA	CTNNA3	intronic	0.34375
10	124227912	124227963	CAT	HTRA1	intronic	0.2857142857142857
X	133797462	133797509	CGTG	PLAC1	intronic	0.5555555555555556
17	1012473	1012493	CCG	ABR	intronic	0.5714285714285714
20	35685395	35685467	CCTA	RBL1	intronic	0.2222222222222222
10	73180143	73180161	ATGGTG	CDH23	intronic	9.875
8	12501496	12501730	TGGA	LOC729732	downstream	0.06896551724137931
8	37591979	37592035	GGAA	ERLIN2;LOC101929622;LOC102723701	downstream	0.4
X	8990163	8990338	TTATA	FAM9B	downstream	0.3829787234042553
5	175318699	175318733	TAA	CPLX2	downstream	0.3333333333333333
19	51311576	51311753	CCCCAA	C19orf48;LINC01869;SNORD88A;SNORD88B;SNORD88C	upstream	0.25
5	10639122	10639298	CGCGG	ANKRD33B	intronic	0.7407407407407407
3	13972783	13972946	CCA	FGD5P1;TPRXL	upstream	0.09090909090909091
19	3529181	3529354	TGAG	FZR1	intronic	0.19444444444444445
18	2678201	2678285	TTTC	SMCHD1	intronic	0.275
19	303166	303536	CACAC	MIER2	upstream	0.2153846153846154
12	3481147	3481206	CATA	PRMT8;LINC02417	downstream	0.4375
8	6538372	6538421	TTCC	MCPH1-AS1	intronic	0.5
10	25939924	25940091	GAAA	LINC00836	upstream	1.0784313725490196
Y	4995230	4995262	TTA	PCDH11Y	intronic	0.5
10	34550616	34550772	GAAA	PARD3	intronic	0.2564102564102564
5	149010679	149010731	TTCC	ARHGEF37	intronic	0.3076923076923077
X	12298366	12298398	TAA	FRMPD4	intronic	0.38461538461538464
11	22682870	22682906	TTTA	GAS2	intronic	0.375
19	17736844	17737021	TCCA	UNC13A	intronic	0.4
19	17567116	17567151	TAAA	NXNL1	intronic	0.4
1	179457707	179457880	TTTC	AXDND1	exonic	0.2564102564102564
5	40738521	40738705	TAAAA	TTC33	intronic	0.13157894736842105
1	48992219	48992393	TAG	AGBL4	downstream	0.12244897959183673
7	155751277	155752243	TATAG	LOC389602	upstream	0.04371584699453552
1	161021757	161021850	CCA	ARHGAP30	intronic	0.23076923076923078
3	72101906	72101946	CAAAA	LINC00877	intronic	0.3333333333333333
4	188225649	188226044	TCTCTG	LOC339975	exonic	0.7636363636363637
8	144500477	144500724	CCCA	MAFA-AS1	intronic	1.0175438596491229
17	9920068	9920114	TAA	GAS7	intronic	0.4
10	56091994	56092150	TATAA	PCDH15	intronic	3.9310344827586206
7	39041936	39041962	TTG	POU6F2-AS2	intronic	0.36363636363636365
15	71138952	71138991	CATA	LARP6	intronic	0.3333333333333333
12	101985534	101985681	TTCTCC	MYBPC1	intronic	0.5862068965517241
9	137561058	137561201	TTCCC	COL5A1	intronic	0.5714285714285714
19	6061987	6062007	CAAA	RFX2	intronic	0.8
8	143583478	143583636	TGG	ADGRB1	intronic	4.483333333333333
7	116495838	116495943	TTTC	CAPZA2	intronic	0.15151515151515152
3	54184990	54185231	TGGA	CACNA2D3	intronic	0.6610169491525424
X	53111752	53111780	CCG	TSPYL2	exonic	1.8
2	185539745	185539904	TATG	ZNF804A	intronic	0.11764705882352941
1	34546522	34546578	GAAA	CSMD2	intronic	0.5882352941176471
9	140412272	140412562	CACTC	PNPLA7	intronic	0.8852459016393442
11	101760046	101760215	GAAA	ANGPTL5	downstream	0.851063829787234
1	181025500	181025546	TAA	MR1	UTR	0.5454545454545454
7	157897341	157897578	CCCCAG	PTPRN2	intronic	0.2647058823529412
12	111733555	111733584	TTAA	CUX2	intronic	0.5454545454545454
17	46431289	46431350	GAA	SKAP1	intronic	0.09090909090909091
9	24546365	24546442	TTCC	IZUMO3	intronic	2.0
18	77707526	77707674	CACCC	PQLC1	intronic	0.10869565217391304
16	15859179	15859356	TGGA	MYH11	intronic	1.1395348837209303
3	112314673	112314734	TCTA	CCDC80;LINC01279	downstream	0.5
12	47752901	47752924	TTTG	MIR4494	intronic	0.7142857142857143
22	20690195	20690691	TTATA	LOC101927859	upstream	0.2
13	97162340	97162398	TTTTA	HS6ST3	intronic	0.6666666666666666
10	95321645	95321799	GAAA	FFAR4	upstream	0.21212121212121213
11	133010621	133010801	CGA	OPCML	intronic	1.09375
9	100011543	100011577	TTTC	LOC100499484;LOC100499484-C9ORF174	intronic	0.9642857142857143
22	17527859	17527909	TAA	CECR7	intronic	0.3333333333333333
16	53744998	53745029	CAT	FTO	intronic	0.4
9	69737105	69737283	AAATG	LOC101928381	downstream	0.47058823529411764
X	129070603	129070645	GAAAA	UTP14A	intronic	0.75
18	67314182	67314440	TCTA	DOK6	intronic	0.06451612903225806
2	70021625	70021708	TTATG	ANXA4	intronic	0.2777777777777778
20	36001601	36001882	CATA	SRC	intronic	0.140625
16	25044456	25044485	CAA	LOC554206	intronic	0.5
1	86021762	86021857	TCC	DDAH1	intronic	0.16129032258064516
3	159967074	159967122	TTA	IFT80	intronic	1.3125
15	33304982	33305088	TGG	FMN1	exonic	0.4666666666666667
5	78264133	78264185	TTA	ARSB	intronic	0.25
7	133574154	133574180	TTA	EXOC4	intronic	2.0
4	173408343	173408521	TTTC	GALNTL6	intronic	1.2826086956521738
8	39844384	39844411	TTA	IDO2	intronic	0.3076923076923077
9	129086781	129086794	GAA	MVB12B	upstream	1.6470588235294117
19	7053651	7053752	TATAA	MBD3L2;MBD3L3	downstream	0.6956521739130435
17	60556629	60556649	CGG	TLK2	UTR	1.3333333333333333
X	144890252	144890374	GGA	SLITRK2	upstream	0.14285714285714285
15	89868271	89868513	TGAG	POLG	intronic	4.9818181818181815
16	29309374	29309740	TGGA	SNX29P2	intronic	0.3176470588235294
3	181736596	181736777	TTTC	LINC01206	downstream	0.11904761904761904
20	60129777	60129908	CATG	CDH4	intronic	0.13793103448275862
10	13284429	13284489	TAAA	UCMA	upstream	0.3333333333333333
7	83720417	83720603	GAAA	SEMA3A	intronic	0.4819277108433735
X	17106047	17106128	TAGA	REPS2	intronic	0.3
4	71487498	71487653	TATAA	ENAM	upstream	0.6904761904761905
7	83249185	83249260	TAGA	SEMA3E	intronic	0.23809523809523808
12	40675991	40676015	TTCC	LRRK2	intronic	2.727272727272727
X	3001703	3001815	TCTA	ARSF	intronic	4.048780487804878
2	232245663	232245832	CACTC	ARMC9	upstream	0.4666666666666667
4	70366201	70366382	GAAA	UGT2B4	intronic	0.23809523809523808
6	135854018	135854067	GAA	LINC00271	intronic	1.975
3	54855661	54855789	TTTC	CACNA2D3	intronic	0.1875
16	25031493	25031563	GGAA	ARHGAP17	exonic	0.42857142857142855
8	65264630	65264668	TGG	LOC102724623	intronic	0.4444444444444444
20	47321051	47321103	TTCC	PREX1	intronic	0.2857142857142857
4	114255677	114256006	TTAA	ANK2	intronic	0.273972602739726
7	80312227	80312409	TATATG	CD36	downstream	0.7441860465116279
3	114655100	114655153	CATG	ZBTB20	intronic	0.36363636363636365
9	86941548	86941599	CAA	SLC28A3	intronic	0.26666666666666666
15	77165617	77165727	GGAA	SCAPER	intronic	0.34615384615384615
2	114579005	114579168	TTTC	LOC101060091	downstream	1.2285714285714286
19	35895275	35895298	TTG	LINC01531	intronic	1.3
3	114578029	114578203	TTCC	ZBTB20	intronic	0.8571428571428571
19	11698307	11698367	TAGA	ACP5;ZNF627	intronic	0.967741935483871
21	33299263	33299336	TTTC	HUNK	intronic	0.17647058823529413
3	194871599	194871628	TCTCCC	XXYLT1-AS2	intronic	0.6666666666666666
19	16153880	16154147	TGGA	LINC00905	downstream	0.984375
16	6422892	6423032	TGGA	RBFOX1	intronic	0.18181818181818182
14	104551736	104551858	CCCCG	ASPG	upstream	0.875
3	53088721	53088775	GAAAA	SFMBT1	intronic	0.4444444444444444
1	29173333	29173513	TTTC	OPRD1	intronic	0.37254901960784315
2	11032689	11032718	TTCC	LINC01954	downstream	0.4166666666666667
3	191089036	191089081	TGG	CCDC50	intronic	0.23076923076923078
11	85529699	85529754	TCTA	SYTL2	upstream	0.3125
18	49911998	49912033	TAG	DCC	intronic	0.2727272727272727
11	70431658	70432024	TCCA	SHANK2	intronic	0.5
2	201835333	201835353	CAA	ORC2;FAM126B	intronic	0.7
X	122618280	122618308	TTG	GRIA3	intronic	0.6666666666666666
4	7095207	7095356	TTTC	LINC02447	downstream	0.1282051282051282
2	191319917	191319990	TTA	MFSD6	intronic	0.8095238095238095
1	93297314	93297367	CAAAA	RPL5;SNORA66;SNORD21;FAM69A	upstream	0.38461538461538464
13	97951902	97951948	TCTA	MBNL2	intronic	0.26666666666666666
22	46816203	46816384	CTCA	CELSR1	intronic	0.1794871794871795
9	4580717	4580796	TAG	SLC1A1	intronic	0.5
4	5704962	5705027	TTA	EVC2	intronic	0.8571428571428571
19	36211452	36211592	CCA	KMT2B	exonic	0.1
19	34244307	34244386	CCCA	CHST8	intronic	1.1904761904761905
2	130878467	130878504	CAAGC	POTEF	intronic	0.7142857142857143
19	51365323	51365397	TTAAA	KLK3	intronic	0.2857142857142857
22	42053494	42053541	TTA	XRCC6	intronic	0.38461538461538464
12	118021278	118021333	TGGG	KSR2	intronic	0.4444444444444444
10	34670869	34670917	GAAAA	PARD3	intronic	0.6666666666666666
12	121432981	121433235	CACTC	HNF1A	intronic	1.8043478260869565
15	49870666	49870690	TAGA	FAM227B	intronic	0.5555555555555556
8	3343284	3343358	TAAAA	CSMD1	intronic	0.3076923076923077
12	39296006	39296185	GAAA	CPNE8	intronic	0.13580246913580246
16	33291994	33292404	AAATG	LOC390705	downstream	0.08333333333333333
3	61856782	61856917	TTATG	PTPRG	intronic	0.24
7	66649581	66649705	TTATG	TYW1	intronic	0.21739130434782608
12	81927471	81927532	TCTA	PPFIA2	intronic	0.375
11	1633344	1633368	CAAA	KRTAP5-3;KRTAP5-4	upstream	0.8333333333333334
1	50599234	50599347	GAAA	ELAVL4	intronic	0.1935483870967742
14	33408040	33408088	CCG	NPAS3	intronic	1.0555555555555556
21	16446293	16446403	TTCTC	NRIP1	downstream	0.21739130434782608
16	51053812	51054001	CACTC	LINC02127	intronic	0.15555555555555556
7	141783418	141783721	TGG	MGAM	intronic	0.1956521739130435
19	45036539	45036676	GAAA	CEACAM20;CEACAM22P	upstream	0.18181818181818182
18	43672146	43672200	TAA	ATP5A1	intronic	0.2222222222222222
2	193067742	193067922	TCTA	TMEFF2	upstream	0.13043478260869565
7	53856506	53856566	TAGA	LINC01446	intronic	1.4210526315789473
4	52904242	52904273	CCCCG	SGCB	intronic	0.6666666666666666
14	76013521	76013616	TCC	BATF	downstream	0.5517241379310345
1	114154558	114154592	TTTA	MAGI3	intronic	0.2727272727272727
4	4860241	4860262	TTA	MSX1;LINC01396	upstream	0.5555555555555556
3	6969116	6969225	GAAA	GRM7	intronic	0.17857142857142858
12	117277510	117277579	TGGA	RNFT2	intronic	0.9444444444444444
11	73609277	73609314	GGGAGA	PAAF1	intronic	0.4444444444444444
13	63262248	63262446	TATAA	LINC00448	intronic	0.62
13	20792684	20792777	TTTC	GJB6	downstream	1.1666666666666667
4	170066926	170067106	TTATA	SH3RF1	intronic	0.5
1	218722920	218722947	CAA	MIR548F3	downstream	0.6071428571428571
11	33211599	33211654	CTGGGG	CSTF3-AS1	exonic	1.25
2	158947034	158947054	CAAA	UPP2	intronic	0.8333333333333334
14	47866830	47866963	CATA	MDGA2	intronic	0.2
22	47044179	47044528	TGGA	GRAMD4	intronic	0.07228915662650602
1	20911958	20912002	TTA	CDA	upstream	0.3076923076923077
16	77368568	77368757	CTATA	ADAMTS18	intronic	0.2702702702702703
2	100564082	100564143	TAGA	AFF3	intronic	0.59375
X	623738	623920	TATG	SHOX	downstream	0.15555555555555556
X	15453346	15453398	GAAA	PIR-FIGF	intronic	0.6923076923076923
19	49864064	49864188	CAGAGA	TEAD2	intronic	0.5789473684210527
17	44018955	44019122	TTCC	MAPT	intronic	0.3125
22	43719262	43719640	TCCA	SCUBE1	intronic	0.056818181818181816
13	99641562	99641635	TAA	DOCK9	intronic	0.16
11	17918302	17918487	GGGAA	SERGEF	intronic	1.0101010101010102
9	91674992	91675177	TGG	SHC3	intronic	0.12280701754385964
7	628524	628703	ATGGTG	PRKAR1B	intronic	1.593952483801296
11	66715483	66715536	TAGA	PC	intronic	0.2857142857142857
5	24532361	24532386	TAA	CDH10	intronic	0.42857142857142855
3	85617553	85617740	TTTC	CADM2	intronic	1.1886792452830188
5	107478679	107478704	TAA	FBXL17	intronic	0.4
X	1649227	1649664	TCTA	P2RY8	intronic	0.16666666666666666
19	42122833	42122891	TAGA	CEACAM4	downstream	0.25
12	104299137	104299319	GGGA	TTC41P	intronic	0.9605263157894737
19	40355497	40355517	TTG	FCGBP	intronic	2.0
6	15399717	15399773	TATATG	JARID2	intronic	0.4
12	3829372	3829548	GAAA	CRACR2A	intronic	0.175
X	1515080	1515236	TGGA	ASMTL-AS1;LINC00106;SLC25A6;ASMTL	upstream	3.8947368421052633
X	2304197	2304239	TTTA	DHRSX	intronic	0.4166666666666667
16	24230562	24230595	TTTTG	PRKCB	UTR	0.4
8	65493292	65493322	CGG	BHLHE22	intronic	0.7272727272727273
7	83248204	83248299	CATA	SEMA3E	intronic	0.22727272727272727
3	89257550	89257565	GGAA	EPHA3	intronic	2.2
6	12897930	12897964	TTA	PHACTR1	intronic	0.6
8	37213514	37213678	TGGA	MIR1268A	upstream	1.525
15	88131751	88131932	TATG	LINC00052	intronic	0.13157894736842105
8	144325531	144325561	AGGGGG	ZFP41	upstream	0.7672413793103449
10	93332969	93333149	GAAA	HECTD2-AS1	downstream	0.17391304347826086
4	140811057	140811144	CTG	MAML3	exonic	0.2
7	101132872	101133201	TTTC	COL26A1	intronic	1.3676470588235294
11	83288648	83288835	TTATA	DLG2	intronic	0.38235294117647056
19	41746257	41746399	TGGA	AXL	intronic	2.8378378378378377
9	137560387	137560984	TCCA	COL5A1	intronic	0.035211267605633804
3	71253081	71253142	GGAA	FOXP1	intronic	0.3125
22	26743162	26743194	ATG	SEZ6L	intronic	0.4166666666666667
1	23150658	23150754	TGGA	EPHB2	intronic	0.8636363636363636
18	53442950	53442999	TCTA	LINC01415	intronic	0.38461538461538464
12	104410439	104410701	GAAA	GLT8D2	intronic	0.22666666666666666
1	97568009	97568052	TCTA	DPYD-AS1	intronic	0.7857142857142857
12	132403270	132403618	GTGTG	ULK1	intronic	0.7346938775510204
14	52497199	52497383	GAAA	NID2	intronic	1.3414634146341464
6	130503802	130503842	GGAA	SAMD3	intronic	0.9310344827586207
2	75080645	75080692	CAA	HK2	intronic	0.375
1	201150573	201150664	TTC	IGFN1;TMEM9	upstream	0.16129032258064516
19	51908611	51908651	TTTC	SIGLEC10	downstream	0.7586206896551724
X	135416229	135416318	TTTC	ADGRG4	intronic	0.38095238095238093
20	46414124	46414326	CCG	SULF2	UTR	0.08333333333333333
5	43214029	43214082	TTTC	NIM1K	intronic	0.3548387096774194
17	35954240	35954393	TAA	SYNRG	intronic	0.36363636363636365
X	49126294	49126330	CCG	PPP1R3F	UTR	1.5833333333333333
12	53353440	53353475	CAA	KRT8;KRT18	upstream	0.3333333333333333
14	46583868	46583957	TTCC	LINC00871	intronic	0.3181818181818182
5	74908136	74908182	CCCCCG	ANKDD1B	intronic	1.4285714285714286
X	12211871	12212000	GGAA	FRMPD4	intronic	0.4375
11	9935190	9935231	TAAAA	LOC101928008	intronic	0.4
1	231181558	231181733	GAAA	FAM89A	upstream	0.19444444444444445
22	50038716	50039052	TGGA	C22orf34	intronic	0.21428571428571427
1	21315535	21315600	GGAGA	EIF4G3	intronic	0.27450980392156865
9	119808233	119808305	TATG	ASTN2	intronic	0.21052631578947367
5	6463711	6463755	TTA	UBE2QL1	intronic	0.2857142857142857
5	167879753	167879822	TCC	WWC1	intronic	0.22727272727272727
1	56979707	56979728	TAAA	PLPP3	intronic	0.625
6	83627991	83628011	CAA	UBE3D	intronic	0.4444444444444444
10	18481197	18481218	TTCA	CACNB2	intronic	0.5
6	137520430	137520709	TATAA	IFNGR1	intronic	0.18309859154929578
1	164786016	164786042	TTA	PBX1	intronic	0.75
20	60343304	60343477	CATG	CDH4	intronic	0.13513513513513514
3	3831937	3832121	CATATA	LRRN1	intronic	0.4146341463414634
8	32047689	32047715	TTA	NRG1	intronic	0.7777777777777778
7	55774623	55774709	GGAA	FKBP9P1	intronic	0.36363636363636365
17	61990117	61990304	TTTC	CSHL1;GH1	intronic	0.13636363636363635
9	132625186	132625206	TAA	USP20	intronic	1.8
20	52057760	52057822	TTTTA	TSHZ2	intronic	0.35714285714285715
2	133967746	133967799	TATAA	NCKAP5	intronic	0.4
16	16163026	16163071	TAAA	ABCC1	intronic	1.5
5	125606426	125606467	TAA	LOC101927488	intronic	0.1875
10	53497494	53497536	TTA	PRKG1	intronic	0.7
19	17090120	17090477	TCCA	CPAMD8	intronic	1.1794871794871795
18	52785055	52785076	TTTTG	LINC01929	intronic	0.6666666666666666
1	49673104	49673276	TTTC	AGBL4	intronic	0.2857142857142857
5	9407974	9408331	CCA	SEMA5A	intronic	0.06837606837606838
10	5673736	5673833	TAGA	ASB13	downstream	0.6666666666666666
1	7344186	7344239	TTC	CAMTA1	intronic	0.6571428571428571
3	13415503	13415730	CTCA	NUP210	intronic	0.1
21	32538023	32538098	TTAA	TIAM1	intronic	0.3076923076923077
19	51211133	51211222	TTTTC	SHANK1	intronic	0.4
18	13443708	13443733	TCC	LDLRAD4	intronic	0.4
13	80915156	80915176	CCGGG	SPRY2	upstream	0.8
8	7341810	7342110	CTATA	DEFB106A;DEFB106B	intronic	0.19642857142857142
16	89259022	89259261	CCCCG	CDH15	intronic	0.42592592592592593
10	32735812	32735905	TCCC	CCDC7	intronic	0.42857142857142855
7	101159525	101159559	TTTTG	COL26A1	intronic	0.5714285714285714
4	20253619	20253659	CGG	SLIT2	upstream	1.3076923076923077
16	25884881	25885162	TCCA	HS3ST4	intronic	1.4507042253521127
20	59938256	59938318	TTCA	CDH4	intronic	0.5454545454545454
5	42423875	42423934	CGG	GHR	UTR	0.2631578947368421
5	126645639	126645782	TTTC	MEGF10	intronic	0.1282051282051282
19	2104235	2104333	CCCCAA	AP3D1	intronic	1.6428571428571428
17	9908351	9908518	CATG	GAS7	intronic	0.4666666666666667
15	54844429	54844552	TTATA	UNC13C	intronic	0.24
6	3145678	3146415	TTCGGG	BPHL	intronic	0.5943396226415094
19	8018280	8018459	TCC	TIMM44;ELAVL1	downstream	0.25
22	32321050	32321234	TCCA	C22orf24	downstream	0.09836065573770492
22	20378475	20378646	CGGGG	TMEM191B	exonic	0.19230769230769232
9	66942978	66943158	CATCT	LOC101928381	downstream	0.3333333333333333
1	220760594	220760656	TTCC	MARK1	intronic	0.3684210526315789
19	49715837	49715934	TTCC	TRPM4	downstream	0.25925925925925924
9	42834589	42834631	TTA	LOC101928195;LOC101929583	downstream	0.5
7	112436475	112436647	TATAA	TMEM168	upstream	0.35555555555555557
3	178751295	178751330	GAAAA	ZMAT3	intronic	0.5
5	53808634	53808762	TTCC	SNX18	upstream	0.26666666666666666
6	164101538	164101598	TTCC	LOC102724152	upstream	0.6428571428571429
13	35175409	35175508	GAAA	LINC00457;LINC02343	intronic	0.2
11	82045671	82045707	CAT	MIR4300HG	intronic	0.6
X	53115037	53115200	CAA	TSPYL2	exonic	0.13636363636363635
16	13233928	13234050	TTCCC	SHISA9	intronic	0.3181818181818182
19	7228991	7229395	TGGA	INSR	intronic	0.44660194174757284
8	8074817	8074921	TATAA	FAM85B	intronic	0.32
4	69861777	69861905	TATATG	UGT2B10	downstream	0.3548387096774194
11	121052159	121052191	TTA	TECTA	intronic	0.2727272727272727
7	74592230	74592253	TTA	NCF1C;GTF2IP1;GTF2IP4	upstream	0.5
7	99728847	99729027	TTTTC	CNPY4;MBLAC1	intronic	0.13333333333333333
16	89701022	89701211	TTTCC	DPEP1	intronic	0.42424242424242425
18	41985897	41985917	CAA	LINC01478	intronic	0.4444444444444444
19	4811458	4811549	GAA	TICAM1	downstream	0.1836734693877551
14	101467331	101467626	TGAA	MEG8;SNORD114-30;SNORD114-31	downstream	0.07692307692307693
8	52520473	52520649	GAAA	PXDNL	intronic	0.23809523809523808
X	9924104	9924140	TTA	SHROOM2	downstream	0.6551724137931034
18	48341816	48341961	TGG	MRO	exonic	0.18604651162790697
3	120892170	120892206	TAA	STXBP5L	intronic	0.46153846153846156
10	14868378	14868549	GAA	CDNF	intronic	1.9589041095890412
20	60639908	60640021	CGG	TAF4	exonic	0.47368421052631576
5	9840945	9840972	TTTA	LINC02112	intronic	0.75
16	25703622	25703670	CGG	HS3ST4	UTR	0.5
4	99852605	99852648	TTCC	EIF4E	intronic	3.0
6	118433223	118433308	TTTTC	SLC35F1	intronic	0.4666666666666667
5	122425961	122425995	TCC	PRDM6	exonic	0.5454545454545454
2	54369154	54369187	TTG	ACYP2	UTR	1.4615384615384615
17	60354257	60354282	TCCA	TBC1D3P2	intronic	0.8333333333333334
4	66564340	66564401	TTCC	EPHA5-AS1	downstream	0.15625
3	194314846	194314907	TCTA	TMEM44	intronic	0.2857142857142857
19	6530104	6530259	CAGAGA	TNFSF9	upstream	0.56
4	188348545	188348612	TATG	LOC339975	downstream	0.6666666666666666
11	61667034	61667055	CAG	RAB3IL1	intronic	0.8571428571428571
7	74887961	74888031	TTTC	PMS2P5;SPDYE10P	intronic	0.2
19	37909003	37909043	TAA	ZNF569	intronic	0.42857142857142855
X	129751476	129751570	TTTC	ENOX2	downstream	0.20833333333333334
7	33623584	33623623	TTA	BBS9	intronic	0.3076923076923077
5	116878165	116878358	CATATA	LINC00992	intronic	0.3695652173913043
14	94189146	94189199	ATGGTG	PRIMA1	intronic	2.6666666666666665
2	191319658	191319748	TATATG	MFSD6	intronic	0.375
6	29936767	29936805	TCTA	HCG9	downstream	0.2727272727272727
7	132067562	132067677	TATATG	PLXNA4	intronic	0.4375
2	112260321	112260333	TCCA	MIR4435-2HG	intronic	0.6666666666666666
7	134918830	134918857	ATG	STRA8	intronic	0.875
2	95702570	95704973	TGAG	MAL	intronic	0.06810035842293907
1	64704725	64704875	GAA	UBE2U	intronic	1.121212121212121
1	206145209	206145237	TAA	FAM72A;FAM72C	intronic	0.36363636363636365
1	12243727	12243910	TCTA	TNFRSF1B	intronic	0.7857142857142857
4	165082677	165082697	CAT	MARCH1	intronic	1.8181818181818181
14	64819860	64819889	TGAA	TEX21P	intronic	1.0
16	83954505	83954675	TGGA	MLYCD	intronic	0.9649122807017544
17	16515659	16515713	TAA	ZNF624	downstream	0.2222222222222222
12	107967175	107967295	TGGA	BTBD11	intronic	0.125
12	53236743	53236863	GGAA	KRT78	intronic	0.2903225806451613
14	95786154	95786248	CGCGG	CLMN	UTR	0.6333333333333333
9	107624912	107624982	CCGGG	ABCA1	intronic	1.7777777777777777
1	58449852	58449939	GAAA	DAB1	intronic	5.791666666666667
1	34256270	34256444	TCTA	CSMD2	intronic	0.09836065573770492
8	108963278	108963314	TTG	RSPO2	intronic	0.3333333333333333
11	43883264	43883314	TTA	HSD17B12	intronic	0.375
12	129392863	129393044	TTTC	GLT1D1	intronic	1.1219512195121952
6	166032414	166032697	TAGTG	PDE10A	intronic	1.1071428571428572
19	1375564	1375688	TATAA	MUM1	intronic	0.25
1	29508334	29508372	CGG	SRSF4	UTR	0.5384615384615384
17	6385041	6385220	TAGA	PITPNM3	intronic	0.16666666666666666
19	53154971	53154997	GAAA	ZNF83	exonic	0.6666666666666666
10	134941432	134941609	CCCCG	ADGRA1	intronic	0.14285714285714285
10	90691789	90691819	TTA	ACTA2-AS1;ACTA2;STAMBPL1	intronic	0.3333333333333333
14	65472156	65472333	TTTC	CHURC1-FNTB;FNTB	intronic	0.14634146341463414
6	148698343	148698374	CAAA	SASH1	intronic	1.3333333333333333
18	31747496	31747548	TAGA	NOL4	intronic	0.3125
16	27800444	27800985	TGGA	GSG1L	UTR	0.7983193277310925
7	38671044	38671194	CGGGG	AMPH	UTR	0.17391304347826086
21	43351933	43352082	CCA	C2CD2	intronic	0.24193548387096775
12	66808712	66808769	TAAAA	GRIP1	intronic	2.6923076923076925
16	27839135	27839312	TCCA	GSG1L	intronic	1.0512820512820513
1	215764594	215764688	TTCC	KCTD3	intronic	0.6956521739130435
11	89815840	89816016	TTTC	UBTFL1	upstream	0.1864406779661017
2	182153312	182153595	TTATA	LINC01934	intronic	1.0105263157894737
X	9784620	9784655	CTG	SHROOM2	intronic	0.4666666666666667
20	57095164	57095398	TGGA	APCDD1L-AS1	intronic	0.871875
17	79075400	79075455	CACG	BAIAP2	intronic	0.7777777777777778
X	1645016	1645193	TTCA	P2RY8	intronic	0.20930232558139536
15	43586012	43586095	GGGTG	TGM7	intronic	0.8823529411764706
1	118628125	118628161	CGTG	SPAG17	intronic	1.0
18	61846114	61846295	TTAA	LINC01924	intronic	0.16326530612244897
5	90206368	90206419	TCTA	ADGRV1	intronic	0.5384615384615384
3	111770364	111770543	TCTA	TMPRSS7	intronic	0.25
20	43745110	43745285	TTTC	WFDC5;WFDC12	upstream	0.36363636363636365
9	22797031	22797086	TATATG	LINC01239	intronic	0.5714285714285714
12	32374617	32374641	TAA	BICD1	intronic	2.111111111111111
1	28977778	28977836	TAAAA	TAF12;LINC01715;RNU11	downstream	0.38461538461538464
5	68264254	68264397	GGGAA	LINC02198	downstream	0.13793103448275862
6	97831714	97831767	TCTA	LOC101927314;MIR548H3	downstream	0.5333333333333333
2	9052376	9052546	GAAA	MBOAT2	intronic	0.13953488372093023
3	56057795	56057841	GGAA	ERC2	intronic	0.2222222222222222
17	12925853	12925987	TTTC	ELAC2	upstream	0.22857142857142856
17	40372118	40372145	CCTG	STAT5B	intronic	0.75
19	44143945	44143968	CCG	CADM4	UTR	0.625
2	201387040	201387151	TTTC	SGO2	intronic	0.21875
7	6476786	6476831	TAA	DAGLB	intronic	0.375
2	125617969	125618149	TTCC	CNTNAP5	intronic	0.16279069767441862
4	106245648	106245695	TAAAA	TET2-AS1	downstream	0.3076923076923077
2	3298142	3298373	CCCA	EIPR1	intronic	0.1
19	50581587	50581718	GAAA	LOC400710	downstream	0.16666666666666666
10	102036093	102036282	TCTCCC	BLOC1S2	intronic	0.25
1	51204890	51205138	TATATG	FAF1	intronic	0.2
17	57867144	57867194	TTTC	VMP1	intronic	0.35714285714285715
19	45302902	45302925	TTG	CBLC	intronic	0.5555555555555556
20	31041427	31041479	TCG	NOL4L	exonic	0.375
1	49768229	49768351	TTTTA	AGBL4	intronic	0.16
4	7044965	7045087	CGG	LOC100129931	intronic	0.41025641025641024
7	77475853	77475980	TCCCC	PHTF2	intronic	0.18181818181818182
6	5609649	5609817	CCA	FARS2	exonic	0.6129032258064516
1	229699840	229699877	TTA	ABCB10	upstream	0.46153846153846156
7	158348816	158348933	TAGA	PTPRN2	intronic	0.5142857142857142
13	97033616	97033692	TCTA	HS6ST3	intronic	0.44
4	62723362	62723433	TTCC	ADGRL3	intronic	0.5142857142857142
13	103449915	103449935	TAA	KDELC1	intronic	0.42857142857142855
11	116638691	116638734	TAA	BUD13	intronic	0.42857142857142855
1	248248720	248248750	TAAAA	OR2L13	intronic	1.0
7	89933949	89934002	TAGA	CFAP69	intronic	0.631578947368421
11	10653682	10653725	TTTC	MRVI1	intronic	0.14285714285714285
11	69965035	69965192	TGGA	ANO1	intronic	0.5
4	6571372	6571550	GAAA	MAN2B2;PPP2R2C	upstream	1.1090909090909091
17	48940634	48940670	CTG	TOB1	exonic	1.5833333333333333
18	67506158	67506331	CCCCAG	DOK6	intronic	0.19047619047619047
2	64456782	64456893	CGGAG	LOC100507006	intronic	0.25
2	77206822	77206853	TAGA	LRRTM4	intronic	1.0
4	169380905	169381001	GGAA	DDX60L	intronic	0.1935483870967742
18	19014446	19014552	TATATG	GREB1L	intronic	0.21052631578947367
1	235919303	235919377	TCTA	LYST	intronic	0.30434782608695654
15	87577907	87578162	CATA	AGBL1	downstream	1.9078947368421053
22	34268347	34268391	TTA	LARGE1	intronic	0.35714285714285715
16	55482406	55482588	GAAA	MMP2-AS1	intronic	0.2698412698412698
12	105482347	105482373	CAA	ALDH1L2	upstream	0.4166666666666667
6	3457325	3457359	TCC	SLC22A23	upstream	0.7441860465116279
6	130545737	130545778	TTA	SAMD3	intronic	0.3076923076923077
19	302683	302867	CACAC	MIER2	upstream	0.4186046511627907
3	36959949	36960179	GAAA	TRANK1	intronic	0.22641509433962265
5	15261265	15261315	CGTG	LINC02149	intronic	0.625
9	137797639	137797813	TTC	FCN1	downstream	0.3424657534246575
8	54861114	54861486	CATATA	RGS20	intronic	0.28125
9	135061209	135061294	GGA	NTNG2	intronic	0.2962962962962963
8	3805725	3805757	TAA	CSMD1	intronic	0.6
2	226487218	226487313	TTTC	NYAP2	intronic	0.32
6	110789870	110789906	GAA	SLC22A16	intronic	0.42857142857142855
12	108680982	108681125	TGGG	CMKLR1	downstream	0.19230769230769232
7	81193370	81193413	TAGA	LOC105369146	upstream	0.3333333333333333
22	47399380	47399541	CATA	TBC1D22A	intronic	0.25
17	11143948	11143996	CCG	SHISA6	upstream	0.375
9	18696863	18696894	TTA	ADAMTSL1	intronic	0.5
8	94050763	94050848	TCTCCC	MIR8084	upstream	0.5
4	21871336	21871449	TAGA	KCNIP4	intronic	0.18518518518518517
2	99505635	99505809	GAAA	KIAA1211L	intronic	0.42857142857142855
7	153749772	153749793	CTG	DPP6	UTR	0.7142857142857143
6	38009399	38009427	TTC	ZFAND3	intronic	1.0
9	42400292	42400343	CAA	ANKRD20A2;ANKRD20A3	intronic	0.2
10	72448599	72448663	AGGGGG	ADAMTS14	intronic	1.25
10	95466933	95466974	GGAGA	FRA10AC1	upstream	0.75
4	151111351	151111480	TAGA	DCLK2	intronic	0.28125
12	114203143	114203346	TCTCTG	LINC01234	intronic	0.1875
20	45921818	45921997	GGGA	ZMYND8	intronic	0.2926829268292683
6	149364091	149364259	TTTC	UST	intronic	0.0975609756097561
8	31490339	31490361	TAA	NRG1	upstream	0.4
20	62789524	62789704	TCCTG	MYT1	intronic	0.6
10	95718347	95718431	TTTC	PIPSL	exonic	0.2727272727272727
18	53121028	53121107	TAA	TCF4-AS1	intronic	0.19047619047619047
9	93227669	93227738	CATATA	LINC01501	intronic	0.4444444444444444
4	186064759	186064786	CCCG	SLC25A4	intronic	0.5
Y	21270793	21270816	TTTAA	CD24	upstream	1.25
1	1950636	1950739	CGGGG	GABRD	upstream	0.12727272727272726
12	119557541	119557581	ATG	SRRM4	intronic	0.36363636363636365
8	70339695	70339772	TTTC	LINC01603	intronic	0.2608695652173913
5	77229815	77229877	CCA	LOC101929154	downstream	0.3090909090909091
13	22264429	22264605	CTCA	FGF9	intronic	0.10256410256410256
8	22550858	22550959	CCG	EGR3	intronic	0.09615384615384616
1	32928769	32928807	TCC	ZBTB8B	upstream	1.3571428571428572
9	97668737	97668766	TAA	C9orf3	intronic	0.3076923076923077
1	47089209	47089262	CAAG	MOB3C	upstream	0.5
2	26636983	26637016	TTA	DRC1	intronic	0.6
5	80465615	80465793	CCA	RASGRF2	intronic	0.1346153846153846
16	24844778	24845089	TGGA	TNRC6A	downstream	0.08860759493670886
10	1265591	1265719	ATGGTG	ADARB2	intronic	0.55
18	21895570	21895894	TATAA	OSBPL1A	intronic	0.3
8	30048110	30048142	GAA	DCTN6	upstream	0.3333333333333333
16	1999665	1999790	TAGG	RPL3L	intronic	0.5806451612903226
5	59067235	59067387	GAAA	PDE4D	intronic	0.14634146341463414
6	28467697	28467754	TTA	GPX6	downstream	0.42857142857142855
20	62726217	62726386	GGGTG	OPRL1	intronic	0.27586206896551724
3	21445357	21445397	TTTA	VENTXP7	upstream	0.4
17	35338912	35339003	TTC	AATF	intronic	0.16666666666666666
20	36930862	36930900	TAA	BPI	intronic	0.3333333333333333
2	116347727	116347761	TTA	DPP10	intronic	0.5
1	213124819	213124847	CCG	VASH2	UTR	1.0
6	20797991	20798059	TTTTA	CDKAL1	intronic	0.4
22	50023308	50023460	GGCTG	C22orf34	intronic	0.48148148148148145
18	12461408	12461588	TATG	SPIRE1	intronic	0.3333333333333333
21	34693656	34694230	CATA	IFNAR1	upstream	0.9208211143695014
3	49948611	49948679	TAGA	MON1A	intronic	0.6666666666666666
2	3600089	3600217	CCA	RNASEH1	intronic	0.16666666666666666
16	57064226	57064578	TGGA	NLRC5	intronic	0.2604166666666667
17	60665299	60665531	CATATA	TLK2	intronic	0.24242424242424243
8	129018349	129018396	TAA	PVT1	intronic	0.23529411764705882
19	22973483	22973515	TAAA	ZNF99	upstream	0.5555555555555556
22	44594739	44594902	TCCA	PARVG	intronic	0.24242424242424243
X	12363173	12363352	TGGA	FRMPD4	intronic	0.3125
12	3829572	3829658	GAAA	CRACR2A	intronic	2.5
2	105704231	105704292	TTCC	MRPS9	intronic	0.3157894736842105
2	203917442	203917480	TTTA	NBEAL1	intronic	0.38461538461538464
16	11972945	11972965	TAA	GSPT1	intronic	0.5555555555555556
20	52621832	52621876	CAAAA	BCAS1	intronic	0.2857142857142857
16	81504666	81504845	CATA	CMIP	intronic	0.38636363636363635
5	1035101	1035268	TGAG	NKD2	intronic	0.425
22	31365581	31365680	CGG	TUG1	upstream	0.27586206896551724
21	33304219	33304386	CACG	HUNK	intronic	0.95
18	77056983	77057156	CAGAGA	ATP9B	intronic	0.42857142857142855
9	112759041	112759186	TATG	PALM2-AKAP2	intronic	0.8888888888888888
11	64002044	64002093	CCG	VEGFB	UTR	0.8636363636363636
11	84311128	84311284	GAAA	DLG2	intronic	0.1
19	31669920	31669964	ATG	LINC01791	intronic	0.29411764705882354
7	96654042	96654079	GGA	DLX5	UTR	0.5
2	154741280	154741367	TATG	GALNT13	intronic	0.4090909090909091
7	124675890	124675920	CAA	POT1-AS1	intronic	1.6363636363636365
18	213963	214000	TAGA	THOC1;USP14	UTR	0.8
3	26678357	26678506	TTTC	LRRC3B	intronic	0.2571428571428571
2	159558975	159559026	TAA	PKP4-AS1	intronic	0.23529411764705882
7	65116519	65116839	AAATG	INTS4P2;LOC441242	intronic	0.23636363636363636
16	89653738	89653772	CCCCCG	CPNE7	intronic	0.5555555555555556
3	129264953	129265011	TAA	H1FOO	intronic	0.21052631578947367
5	170343033	170343360	TTATA	RANBP17	intronic	0.6
1	169150363	169150430	TCTA	NME7	intronic	0.2222222222222222
10	87987703	87987820	TGGA	GRID1	intronic	0.2
19	14571661	14571981	TCTA	PKN1	intronic	0.06666666666666667
20	45784657	45784813	CATA	EYA2	intronic	0.5526315789473685
3	130353045	130353109	TAAA	COL6A6	intronic	0.23529411764705882
1	87164724	87164790	CATAA	LOC105378828	downstream	0.42857142857142855
1	227314161	227314232	GGAA	CDC42BPA	intronic	0.625
16	20625285	20625464	GCTG	ACSM1	intronic	0.21052631578947367
19	2651256	2651438	TCCC	GNG7	intronic	0.5416666666666666
19	21544882	21544940	TAA	ZNF738	intronic	0.35294117647058826
14	106429496	106429563	GAAA	ADAM6	downstream	0.3888888888888889
4	8869456	8869592	CGG	HMX1	exonic	0.0975609756097561
2	135139057	135139129	CAGA	MGAT5	intronic	0.3333333333333333
5	116877737	116877835	CATA	LINC00992	intronic	0.72
7	151567239	151567289	CAGG	PRKAG2	intronic	0.36363636363636365
X	149862013	149862054	CGG	MTMR1	exonic	0.6428571428571429
7	47402619	47402682	CACCAT	TNS3	intronic	0.9195402298850575
17	80276444	80276622	CGTG	CD7;SECTM1	upstream	0.1282051282051282
10	20315900	20316066	TATAA	PLXDC2	intronic	0.3225806451612903
20	11014928	11015100	TGG	C20orf187	downstream	0.0975609756097561
19	41809988	41810048	CCG	HNRNPUL1	exonic	0.2777777777777778
4	30957093	30957149	TTTTA	PCDH7	intronic	1.8
10	97725133	97725177	TAG	ENTPD1-AS1	intronic	0.5357142857142857
4	6484828	6484901	TAGA	PPP2R2C	intronic	0.2777777777777778
1	111054526	111054579	TCTA	KCNA10	downstream	0.3076923076923077
X	32572916	32572943	GGGA	DMD	intronic	0.36363636363636365
19	56085448	56085538	TAAAA	ZNF579	downstream	0.3157894736842105
7	147834761	147834829	GGAA	MIR548T	intronic	0.42424242424242425
11	64952460	64952521	TATG	CAPN1	intronic	0.6
22	44695579	44695951	CAGAGA	KIAA1644	intronic	1.152542372881356
12	52345493	52345522	CGG	ACVR1B	UTR	0.6666666666666666
11	102601808	102601988	CCCA	MMP8	upstream	0.5
X	136648984	136649015	CCG	ZIC3	exonic	0.7
4	8265373	8265484	CAGAGA	HTRA3	upstream	0.5357142857142857
7	5282379	5282563	GAAA	WIPI2	downstream	0.8787878787878788
2	68743541	68743569	TTA	APLF	intronic	1.8
22	45677928	45678105	GAAA	UPK3A	upstream	0.2987012987012987
18	37028339	37028483	GAAA	MIR924HG	intronic	0.3541666666666667
12	113729814	113729909	TCTG	TPCN1	intronic	0.36363636363636365
1	117200670	117200702	TTTTG	IGSF3	intronic	0.5714285714285714
16	57763358	57763537	TGGG	DRC7	intronic	0.3181818181818182
4	110737359	110737463	CGG	GAR1	exonic	0.8125
4	187173602	187173917	CCA	KLKB1	intronic	0.0898876404494382
19	59069806	59069898	CCG	UBE2M	UTR	0.37777777777777777
7	135246633	135246696	TTCC	NUP205	intronic	0.2222222222222222
3	137476003	137476181	GAAA	SOX14	upstream	0.30357142857142855
12	12402605	12402668	GGAA	LRP6	intronic	0.4166666666666667
2	32458196	32458312	GGAA	NLRC4	intronic	0.2413793103448276
17	4361822	4361997	TTTC	SPNS3	intronic	0.8421052631578947
7	39499051	39499095	TTTTG	POU6F2	intronic	0.5
5	108678035	108678203	CCGG	PJA2	intronic	0.3870967741935484
8	68072239	68072282	TTTTC	CSPP1	intronic	1.6206896551724137
X	64732722	64732755	CTG	LAS1L	exonic	0.4444444444444444
[truncated: 19,359 more rows]

## Sheet: distribution of motif sizes
Motif size	Number
Motif size=3	5800
Motif size=4	10394
Motif size=5	3398
Motif size=6	1766

## Sheet: distribution of genomic regions
genomic regions	Number
downstream	2069
intronic_distal	9686
intronic_proximal	5845
exonic	780
UTR	567
upstream	2411

## Sheet: repeat unit
dSTR related repeat unit	Number
CGG	871
CAG	249
TAAAA	369
